# Supplementary material for: A critical region of A20 unveiled by missense TNFAIP3 variations that lead to autoinflammation
Source: eLife journal article supplement (doi:10.7554/elife.81280), 2023-06-06

# Figure 3F n=1

## IP Flag

|                   |   |   |   |   |   |                                   |
|-------------------|---|---|---|---|---|-----------------------------------|
| HA-K63 ubiquitin  | + | + | + | + | + | Previous<br>experiment<br>samples |
| Flag-TRAF6        | - | + | + | + | + |                                   |
| GFP_A20_WT        | - | - | + | - | - |                                   |
| GFP_A20_Leu236Pro | - | - | - | + | - |                                   |
| GFP_A20_Leu227*   | - | - | - | - | + |                                   |

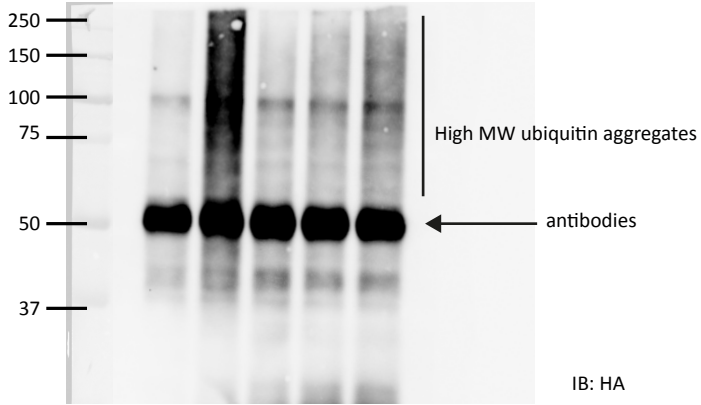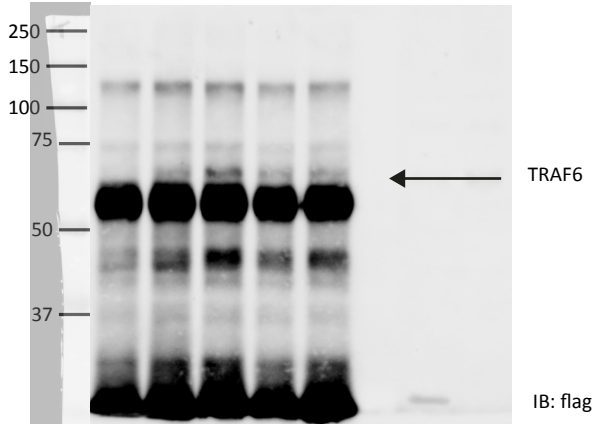

## Crude extracts

|                   |   |   |   |   |   |                                   |
|-------------------|---|---|---|---|---|-----------------------------------|
| HA-K63 ubiquitin  | + | + | + | + | + | Previous<br>experiment<br>samples |
| Flag-TRAF6        | - | + | + | + | + |                                   |
| GFP_A20_WT        | - | - | + | - | - |                                   |
| GFP_A20_Leu236Pro | - | - | - | + | - |                                   |
| GFP_A20_Leu227*   | - | - | - | - | + |                                   |

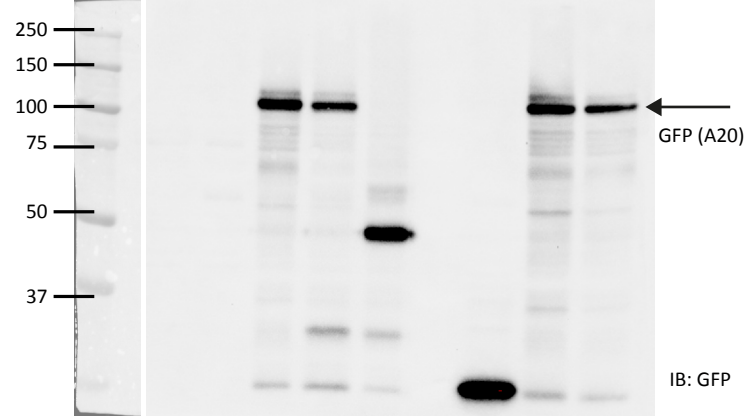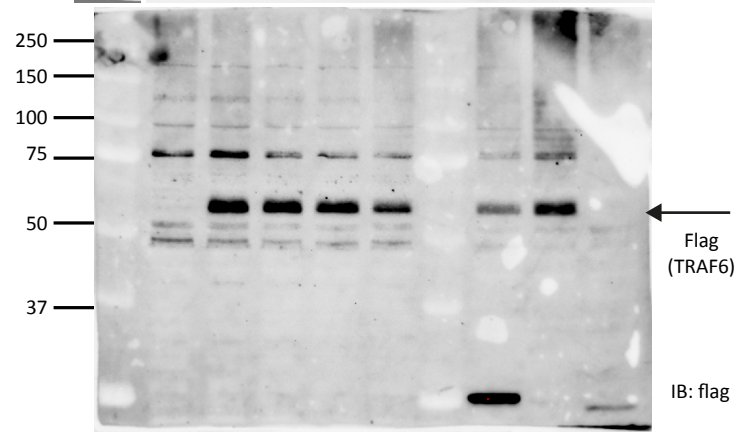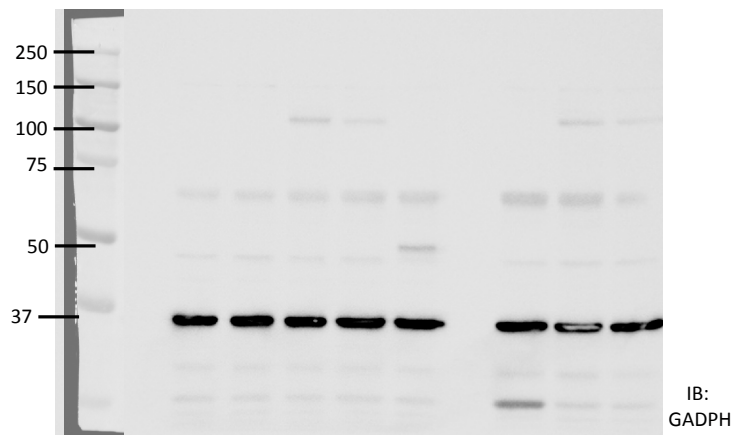

# Figure 3F n=2

## IP Flag

|                   |   |   |   |   |   |   |                                   |
|-------------------|---|---|---|---|---|---|-----------------------------------|
| HA-K63 ubiquitin  | + | + | + | + | + | + | Previous<br>experiment<br>samples |
| Flag-TRAF6        | - | + | + | + | + | + |                                   |
| EGFP-C1           | - | - | + | + | - | - |                                   |
| GFP_A20_WT        | - | - | - | + | - | - |                                   |
| GFP_A20_Leu236Pro | - | - | - | - | + | - |                                   |
| GFP_A20_Leu227*   | - | - | - | - | - | + |                                   |

## Crude extracts

|                   |   |   |   |   |   |   |                                   |
|-------------------|---|---|---|---|---|---|-----------------------------------|
| HA-K63 ubiquitin  | + | + | + | + | + | + | Previous<br>experiment<br>samples |
| Flag-TRAF6        | - | + | + | + | + | + |                                   |
| EGFP-C1           | - | - | + | + | - | - |                                   |
| GFP_A20_WT        | - | - | - | + | - | - |                                   |
| GFP_A20_Leu236Pro | - | - | - | - | + | - |                                   |
| GFP_A20_Leu227*   | - | - | - | - | - | + |                                   |

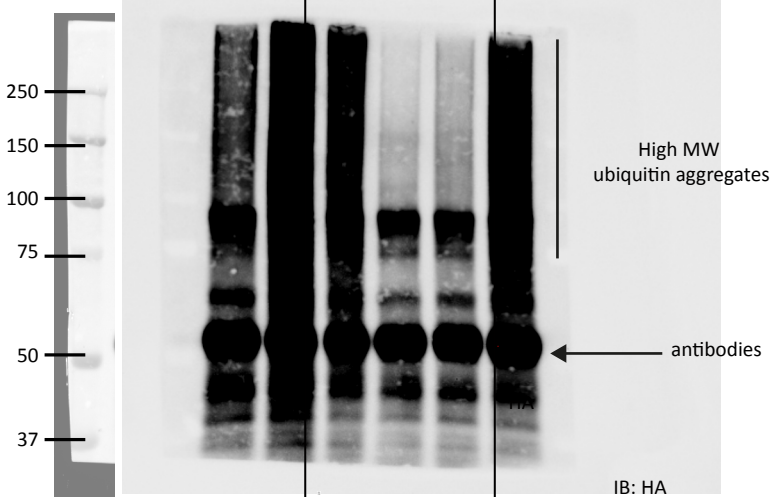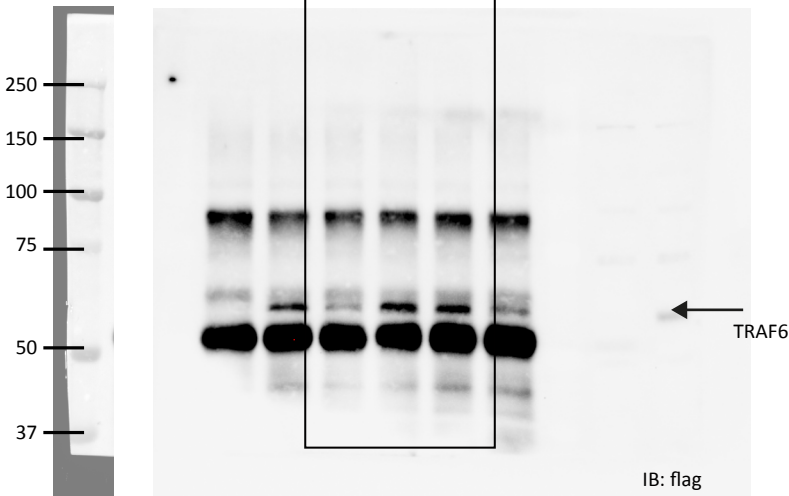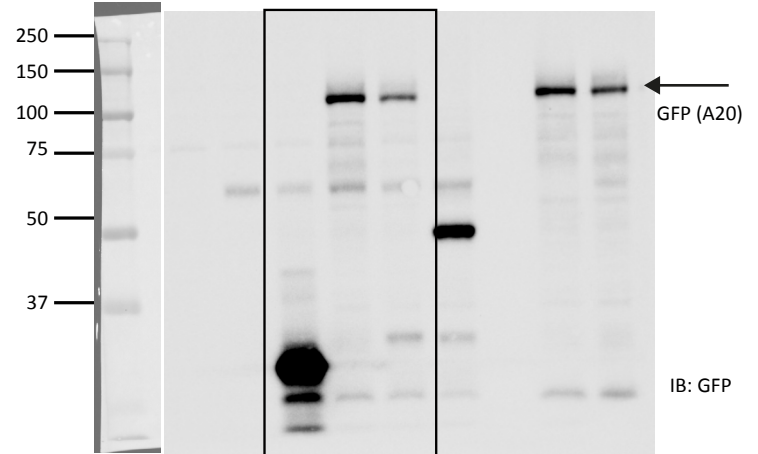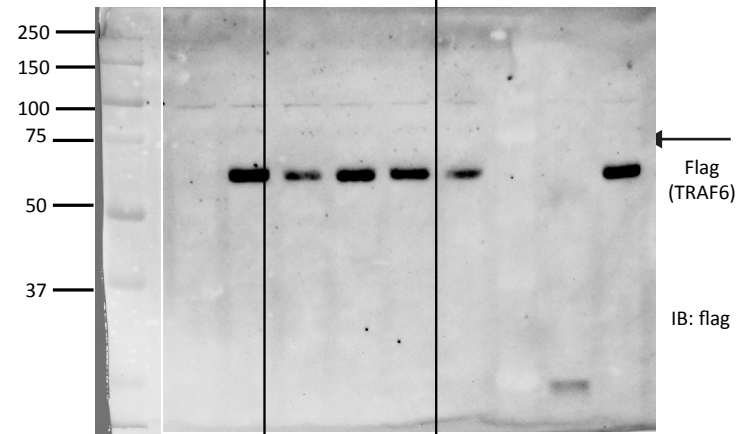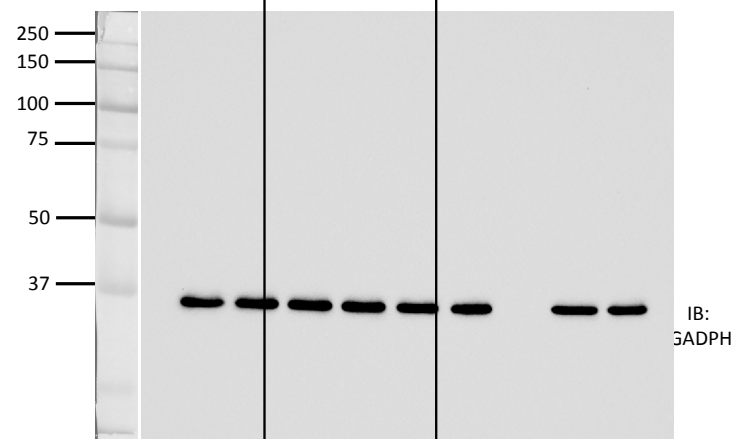

# Figure 3F n=3

## IP Flag

|                   |   |   |   |   |   |   |                                   |
|-------------------|---|---|---|---|---|---|-----------------------------------|
| HA-K63 ubiquitin  | + | + | + | + | + | + | Previous<br>experiment<br>samples |
| Flag-TRAF6        | - | + | + | + | + | + |                                   |
| EGFP-C1           | - | - | + | + | - | - |                                   |
| GFP_A20_WT        | - | - | - | + | - | - |                                   |
| GFP_A20_Leu236Pro | - | - | - | - | + | - |                                   |
| GFP_A20_Leu227*   | - | - | - | - | - | + |                                   |

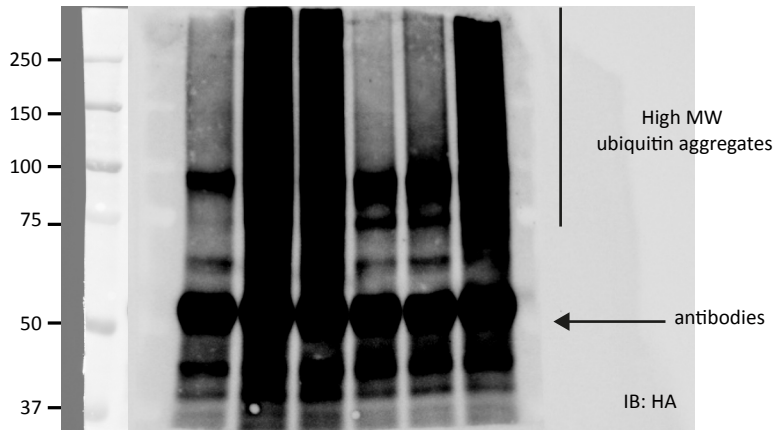

## Crude extracts

|                   |   |   |   |   |   |   |                                   |
|-------------------|---|---|---|---|---|---|-----------------------------------|
| HA-K63 ubiquitin  | + | + | + | + | + | + | Previous<br>experiment<br>samples |
| Flag-TRAF6        | - | + | + | + | + | + |                                   |
| EGFP-C1           | - | - | + | + | - | - |                                   |
| GFP_A20_WT        | - | - | - | + | - | - |                                   |
| GFP_A20_Leu236Pro | - | - | - | - | + | - |                                   |
| GFP_A20_Leu227*   | - | - | - | - | - | + |                                   |

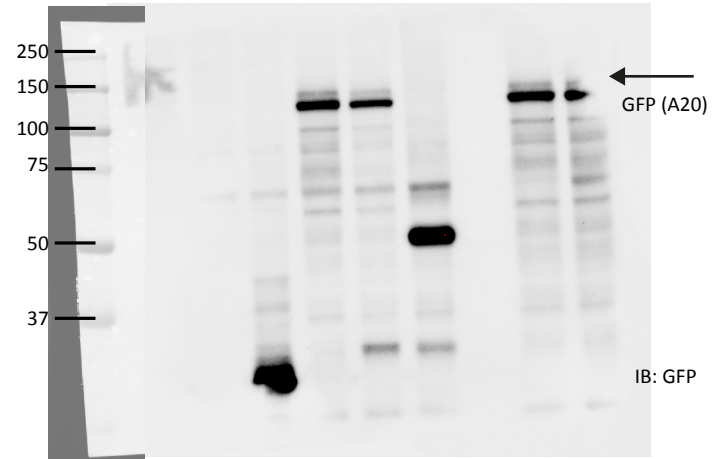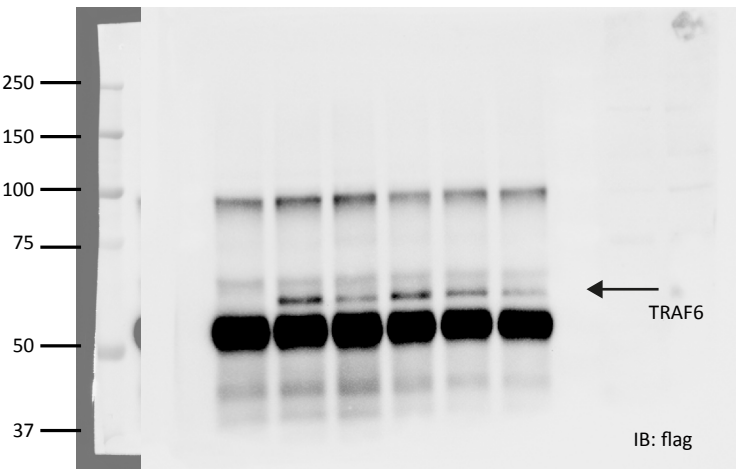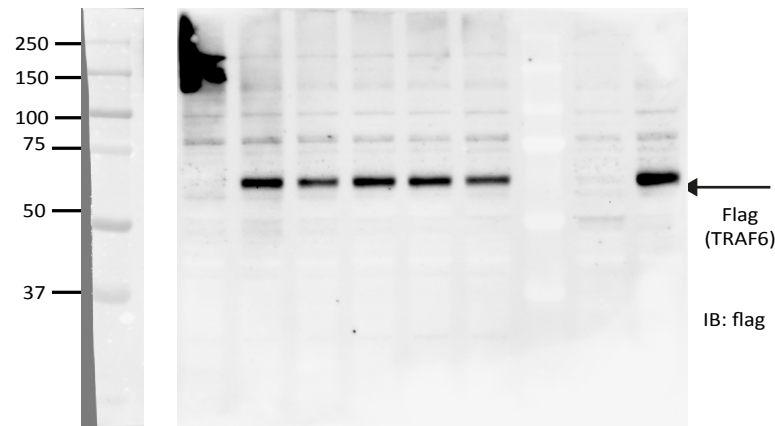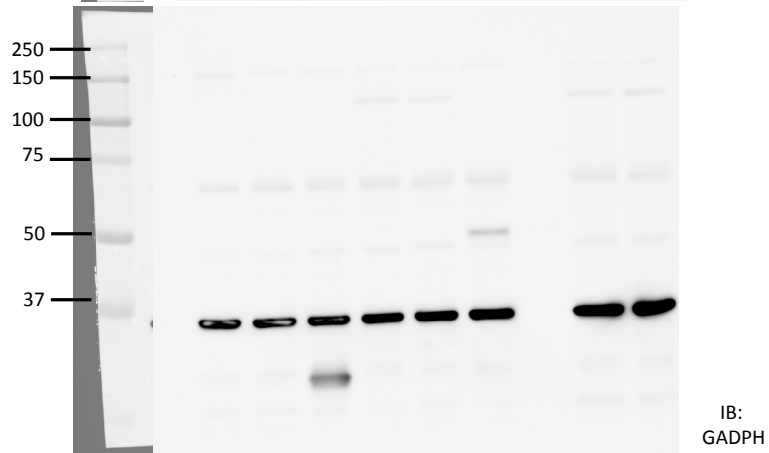

Supplement: fig3-data5 [file elife-81280-fig3-data5-v1.pdf]
