# Supplementary material for: A critical region of A20 unveiled by missense TNFAIP3 variations that lead to autoinflammation
Source: eLife journal article supplement (doi:10.7554/elife.81280), 2023-06-06
Supplement: fig3-data1 [file elife-81280-fig3-data1-v1.pdf]

# Figure 3A

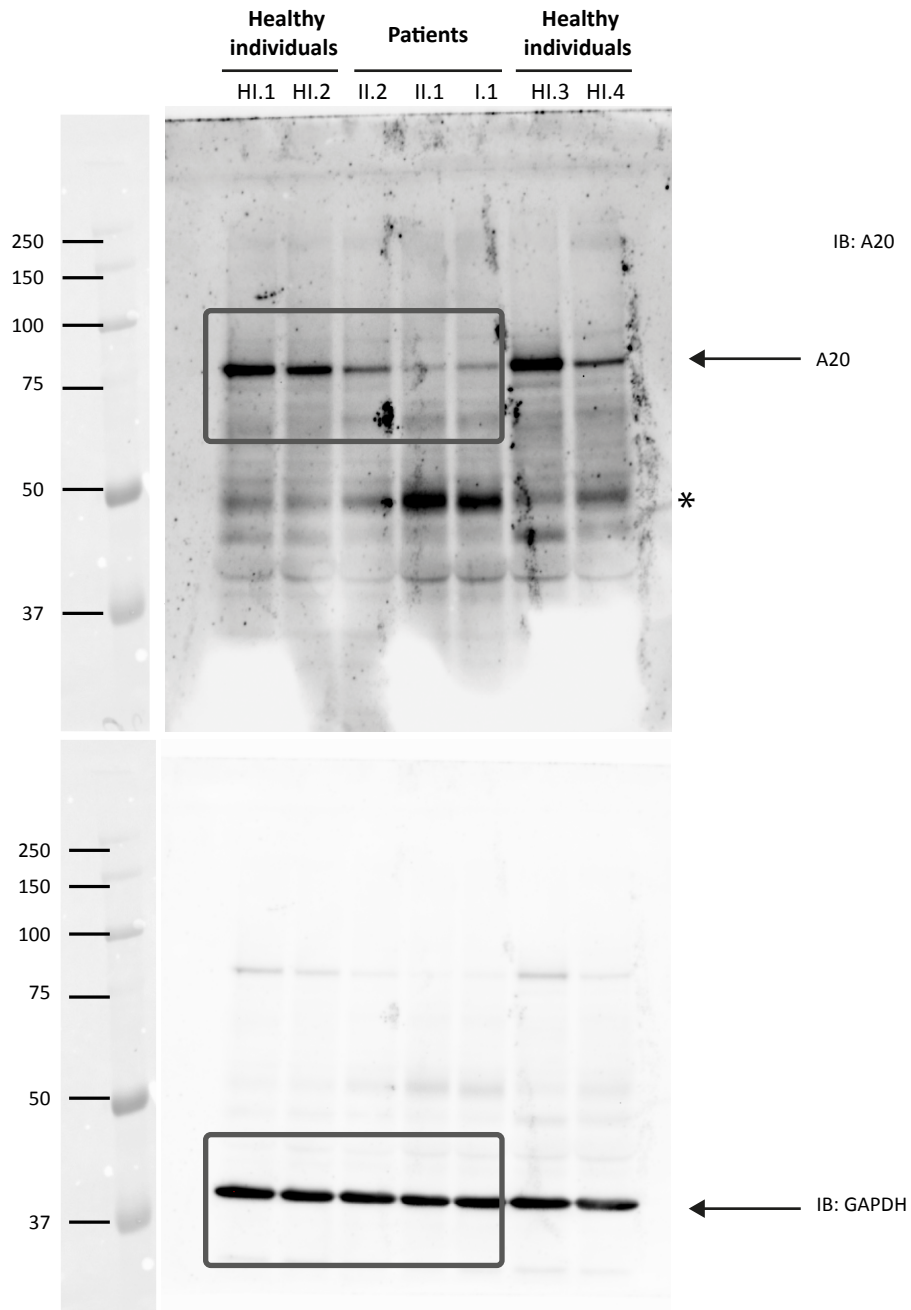

\*: band that is not specific as seen on other WB from PBMC protein extracts of the patients and other healthy individuals
