# Supplementary material for: A critical region of A20 unveiled by missense TNFAIP3 variations that lead to autoinflammation
Source: eLife journal article supplement (doi:10.7554/elife.81280), 2023-06-06

# Figure 3D

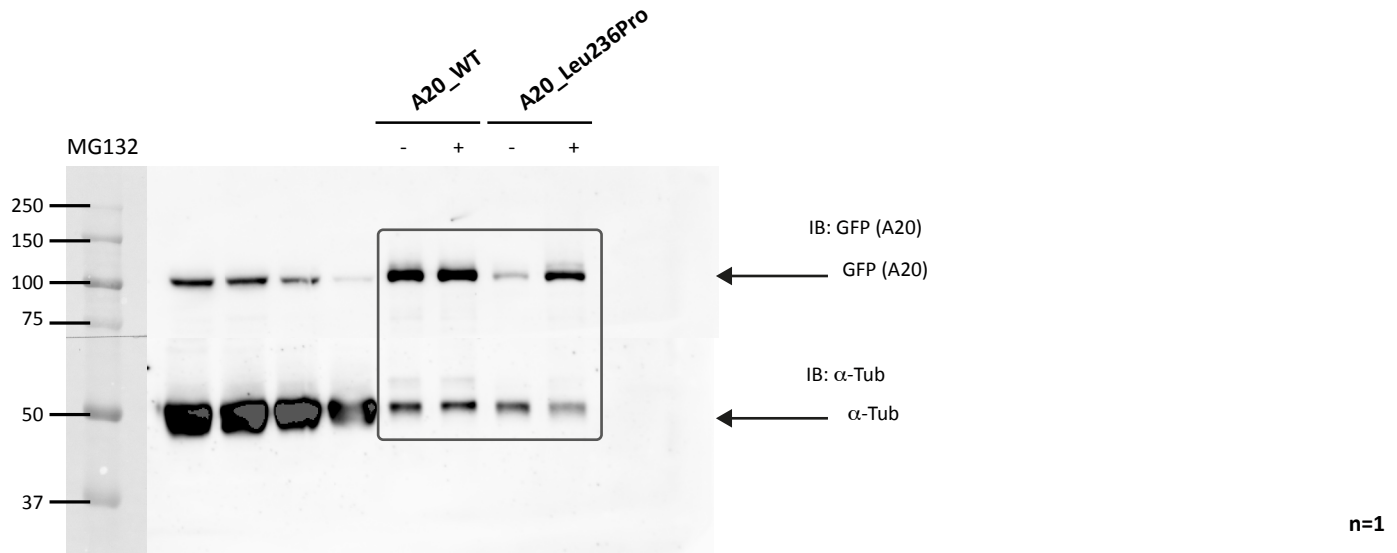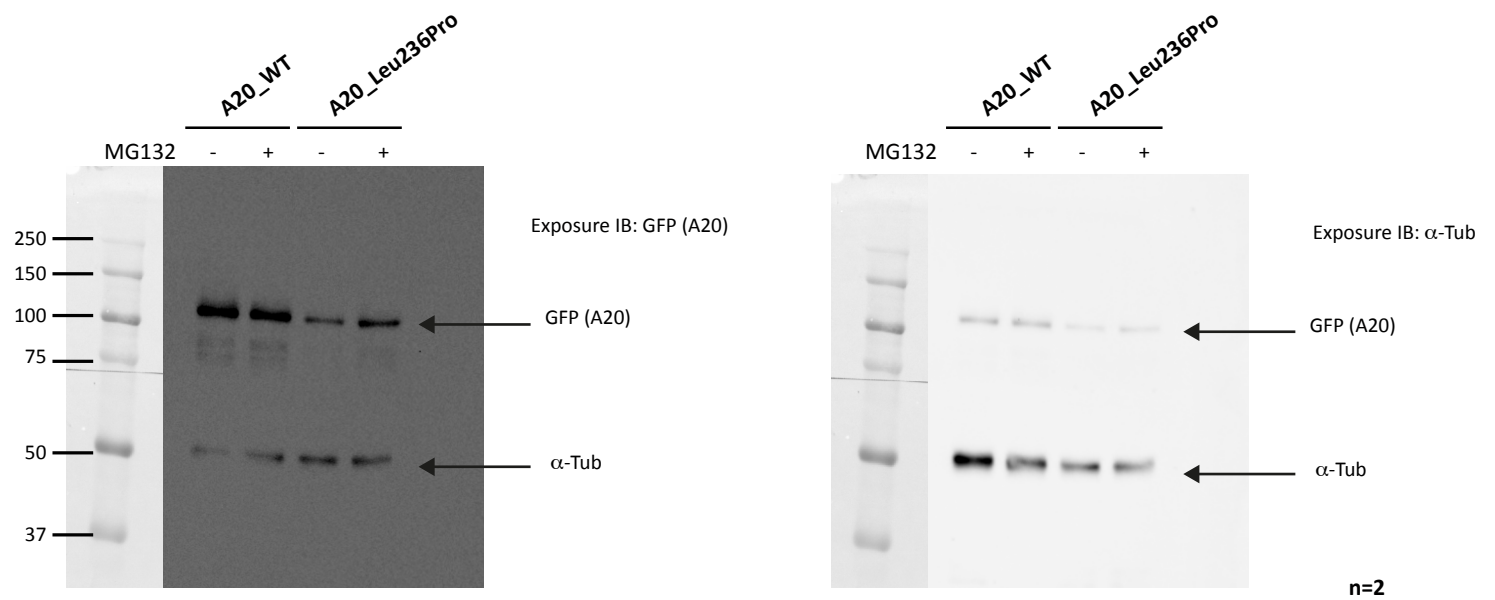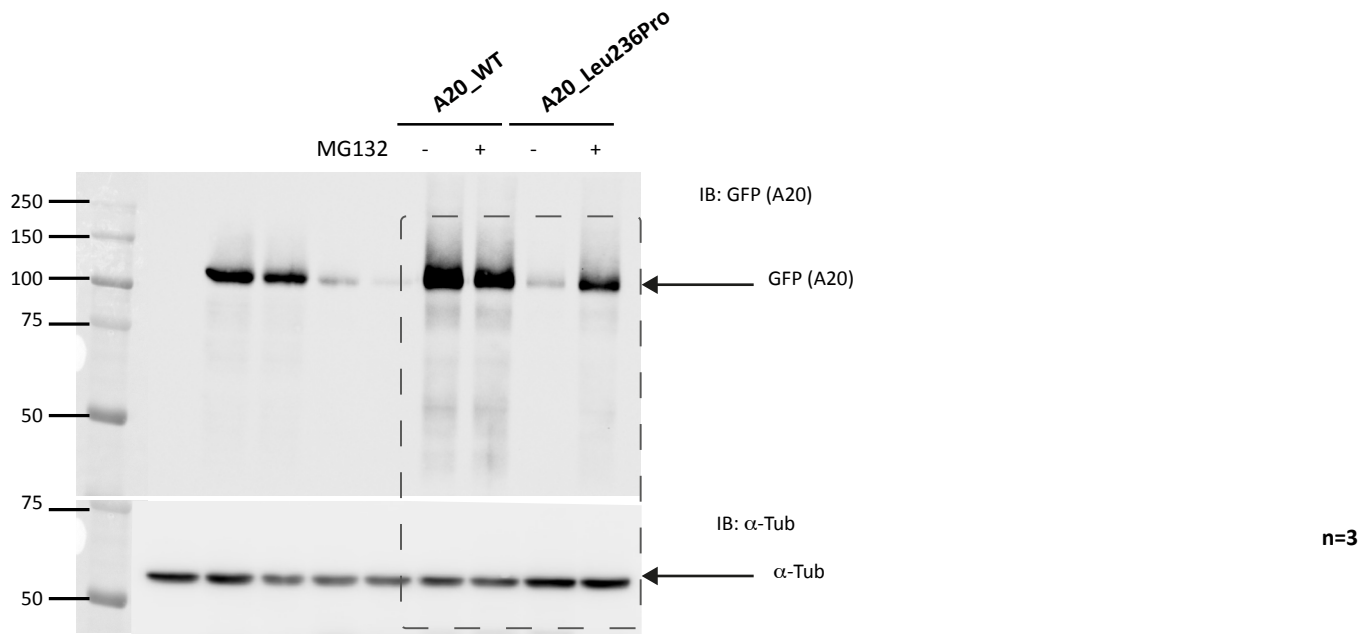

Supplement: fig3-data4 [file elife-81280-fig3-data4-v1.pdf]
