# Supplementary material for: A critical region of A20 unveiled by missense TNFAIP3 variations that lead to autoinflammation
Source: eLife journal article supplement (doi:10.7554/elife.81280), 2023-06-06
Supplement: fig4-data1 [file elife-81280-fig4-data1-v1.pdf]

Results <Default Table>

| FCS Key 1     | FCS Key 2    | Gate    | Region | Count | %Gated | X Median | X Mean | Error Message |
|---------------|--------------|---------|--------|-------|--------|----------|--------|---------------|
| HEK NT        | no trt       | Ungated | A      | 20281 | 60.09  | 333.76   | 364.11 |               |
| HEK NT        | no trt       | A       | B      | 59    | 0.29   | 32.78    | 80.43  |               |
| HEK EV        | DMSO         | Ungated | A      | 20442 | 66.14  | 345.99   | 372.32 |               |
| HEK EV        | DMSO         | A       | B      | 2     | 0.01   | 9.14     | 407.49 |               |
| HEK EV        | MG132 invivo | Ungated | A      | 20324 | 66.00  | 365.17   | 398.57 |               |
| HEK EV        | MG132 invivo | A       | B      | 2     | 0.01   | 8.82     | 23.68  |               |
| HEK EGFP      | DMSO         | Ungated | A      | 20320 | 60.16  | 361.90   | 395.20 |               |
| HEK EGFP      | DMSO         | A       | B      | 621   | 3.06   | 105.54   | 547.22 |               |
| HEK EGFP      | MG132 invivo | Ungated | A      | 20356 | 63.05  | 342.89   | 379.11 |               |
| HEK EGFP      | MG132 invivo | A       | B      | 5723  | 28.11  | 86.60    | 495.77 |               |
| HEK A20 wt    | DMSO         | Ungated | A      | 20337 | 66.03  | 339.82   | 373.60 |               |
| HEK A20 wt    | DMSO         | A       | B      | 7941  | 39.05  | 41.42    | 233.82 |               |
| HEK A20 wt    | MG132 invivo | Ungated | A      | 20372 | 60.69  | 339.82   | 375.11 |               |
| HEK A20 wt    | MG132 invivo | A       | B      | 7427  | 36.46  | 42.17    | 239.34 |               |
| HEK A20 L236P | DMSO         | Ungated | A      | 20413 | 59.81  | 316.23   | 351.04 |               |
| HEK A20 L236P | DMSO         | A       | B      | 6363  | 31.17  | 33.38    | 129.95 |               |
| HEK A20 L236P | MG132 invivo | Ungated | A      | 20511 | 45.14  | 313.40   | 345.50 |               |
| HEK A20 L236P | MG132 invivo | A       | B      | 6381  | 31.11  | 47.40    | 186.91 |               |
| HEK A20 N102S | DMSO         | Ungated | A      | 20608 | 62.42  | 313.40   | 344.84 |               |
| HEK A20 N102S | DMSO         | A       | B      | 7971  | 38.68  | 42.55    | 238.46 |               |
| HEK A20 N102S | MG132 invivo | Ungated | A      | 20422 | 56.46  | 330.77   | 364.94 |               |
| HEK A20 N102S | MG132 invivo | A       | B      | 7292  | 35.71  | 40.32    | 210.86 |               |
| HEK A20 F127C | DMSO         | Ungated | A      | 20437 | 51.84  | 324.88   | 360.72 |               |
| HEK A20 F127C | DMSO         | A       | B      | 7042  | 34.46  | 39.60    | 203.55 |               |
| HEK A20 F127C | MG132 invivo | Ungated | A      | 20502 | 56.35  | 336.78   | 369.13 |               |
| HEK A20 F127C | MG132 invivo | A       | B      | 7064  | 34.46  | 38.89    | 205.07 |               |
| HEK A20 L275P | DMSO         | Ungated | A      | 20291 | 63.47  | 327.81   | 362.52 |               |
| HEK A20 L275P | DMSO         | A       | B      | 6944  | 34.22  | 38.89    | 163.08 |               |
| HEK A20 L275P | MG132 invivo | Ungated | A      | 20233 | 56.41  | 361.90   | 394.65 |               |
| HEK A20 L275P | MG132 invivo | A       | B      | 6811  | 33.66  | 55.23    | 203.61 |               |
| HEK A20 L277  | DMSO         | Ungated | A      | 20326 | 65.97  | 330.77   | 366.91 |               |
| HEK A20 L277  | DMSO         | A       | B      | 5508  | 27.10  | 31.62    | 57.52  |               |
| HEK A20 L277  | MG132 invivo | Ungated | A      | 20278 | 56.96  | 345.99   | 380.09 |               |
| HEK A20 L277  | MG132 invivo | A       | B      | 7679  | 37.87  | 54.74    | 119.21 |               |

Overlay 1

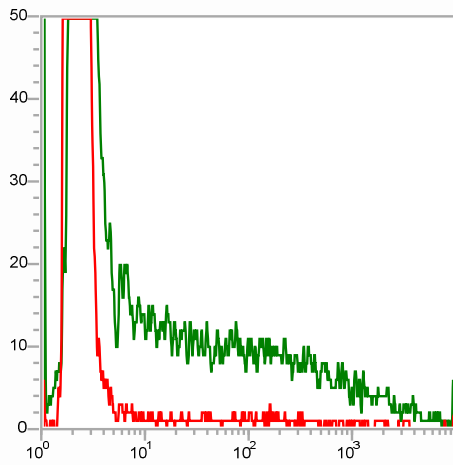

- HEK EGFP DMSO
- HEK EGFP MG132 invivo

FL1-H

Overlay 2

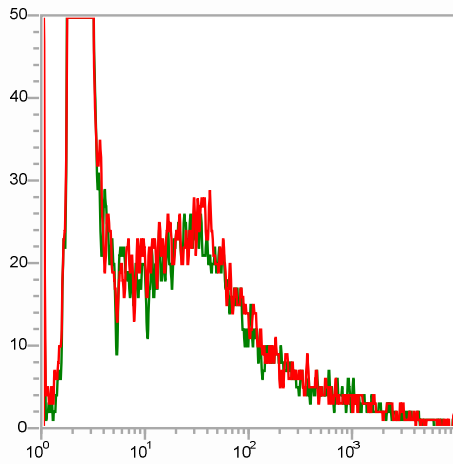

- HEK A20 wt DMSO
- HEK A20 wt MG132 invivo

FL1-H

Overlay 3

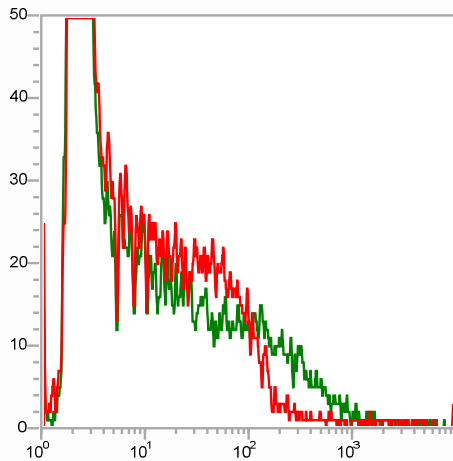

- HEK A20 L236P DMSO
- HEK A20 L236P MG132 invivo

FL1-H

Overlay 4

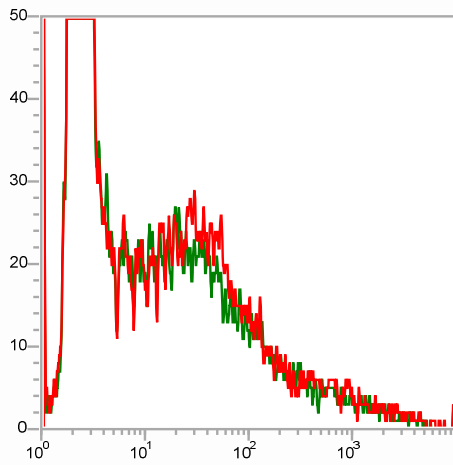

HEK A20 N102S DMSO  
HEK A20 N102S MG132 invivo

FL1-H

Overlay 5

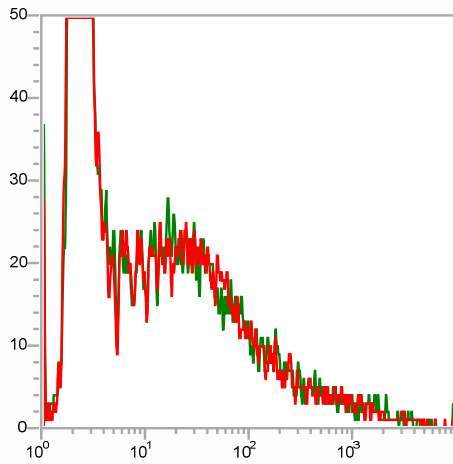

HEK A20 F127C DMSO  
HEK A20 F127C MG132 invivo

FL1-H

Overlay 6

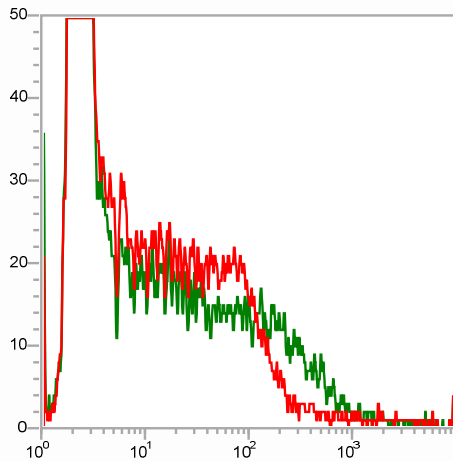

HEK A20 L275P DMSO  
HEK A20 L275P MG132 invivo

FL1-H

### Overlay 7

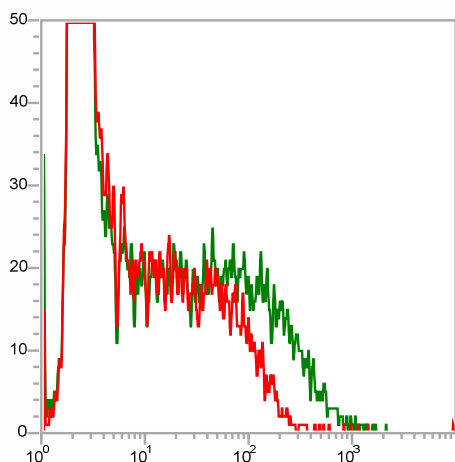

█ HEK A20 L277 DMSO  
█ HEK A20 L277 MG132 invivo

FL1-H

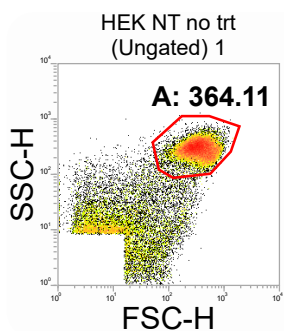

| FCS Key 1 | FCS Key 2 | Gate      | Region | Count | %Gated | X Median | X Mean | Error Message |
|-----------|-----------|-----------|--------|-------|--------|----------|--------|---------------|
| HEK NT    | no trt    | Ungated A | A      | 20281 | 60.09  | 333.76   | 364.11 |               |

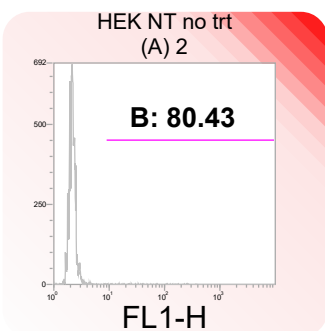

| FCS Key 1 | FCS Key 2 | Gate | Region | Count | %Gated | X Median | X Mean | Error Message |
|-----------|-----------|------|--------|-------|--------|----------|--------|---------------|
| HEK NT    | no trt    | A    | B      | 59    | 0.29   | 32.78    | 80.43  |               |

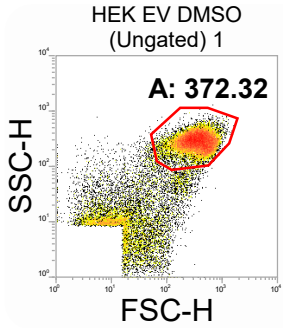

| FCS Key 1 | FCS Key 2 | Gate      | Region | Count | %Gated | X Median | X Mean | Error Message |
|-----------|-----------|-----------|--------|-------|--------|----------|--------|---------------|
| HEK EV    | DMSO      | Ungated A |        | 20442 | 66.14  | 345.99   | 372.32 |               |

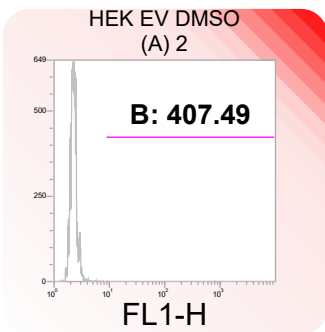

| FCS Key 1 | FCS Key 2 | Gate | Region | Count | %Gated | X Median | X Mean | Error Message |
|-----------|-----------|------|--------|-------|--------|----------|--------|---------------|
| HEK EV    | DMSO      | A B  |        | 2     | 0.01   | 9.14     | 407.49 |               |

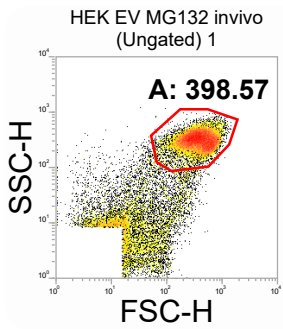

| FCS Key 1 | FCS Key 2    | Gate      | Region | Count | %Gated | X Median | X Mean | Error Message |
|-----------|--------------|-----------|--------|-------|--------|----------|--------|---------------|
| HEK EV    | MG132 invivo | Ungated A |        | 20324 | 66.00  | 365.17   | 398.57 |               |

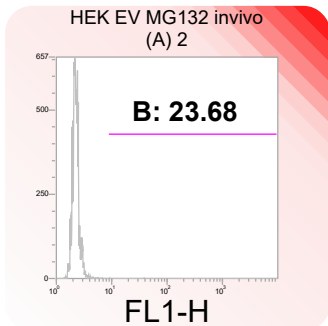

| FCS Key 1 | FCS Key 2    | Gate | Region | Count | %Gated | X Median | X Mean | Error Message |
|-----------|--------------|------|--------|-------|--------|----------|--------|---------------|
| HEK EV    | MG132 invivo | A B  |        | 2     | 0.01   | 8.82     | 23.68  |               |

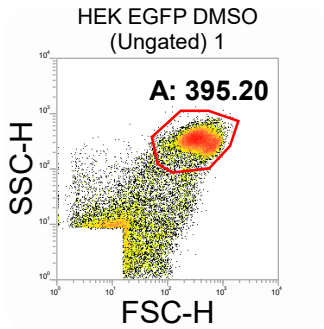

| FCS Key 1 | FCS Key 2 | Gate    | Region | Count | %Gated | X Median | X Mean | Error Message |
|-----------|-----------|---------|--------|-------|--------|----------|--------|---------------|
| HEK EGFP  | DMSO      | Ungated | A      | 20320 | 60.16  | 361.90   | 395.20 |               |

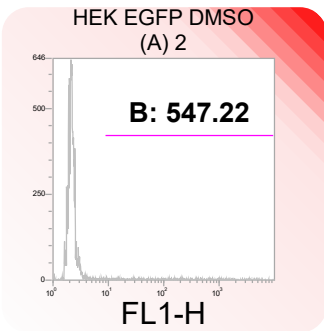

| FCS Key 1 | FCS Key 2 | Gate | Region | Count | %Gated | X Median | X Mean | Error Message |
|-----------|-----------|------|--------|-------|--------|----------|--------|---------------|
| HEK EGFP  | DMSO      | A    | B      | 621   | 3.06   | 105.54   | 547.22 |               |

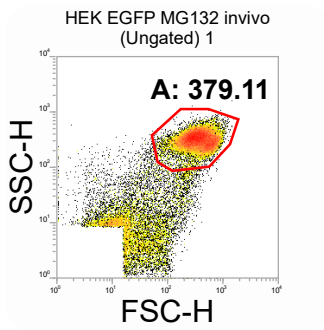

| FCS Key 1 | FCS Key 2    | Gate    | Region | Count | %Gated | X Median | X Mean | Error Message |
|-----------|--------------|---------|--------|-------|--------|----------|--------|---------------|
| HEK EGFP  | MG132 invivo | Ungated | A      | 20356 | 63.05  | 342.89   | 379.11 |               |

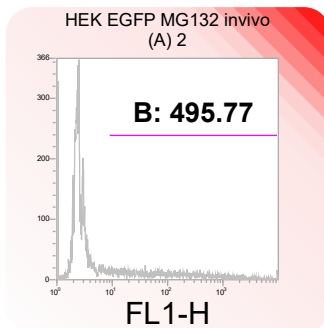

| FCS Key 1 | FCS Key 2    | Gate | Region | Count | %Gated | X Median | X Mean | Error Message |
|-----------|--------------|------|--------|-------|--------|----------|--------|---------------|
| HEK EGFP  | MG132 invivo | A    | B      | 5723  | 28.11  | 86.60    | 495.77 |               |

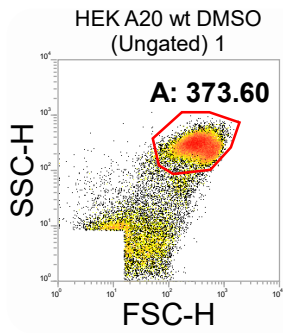

| FCS Key 1       | FCS Key 2 | Gate      | Region | Count | %Gated | X Median | X Mean | Error Message |
|-----------------|-----------|-----------|--------|-------|--------|----------|--------|---------------|
| HEK A20 wt DMSO |           | Ungated A |        | 20337 | 66.03  | 339.82   | 373.60 |               |

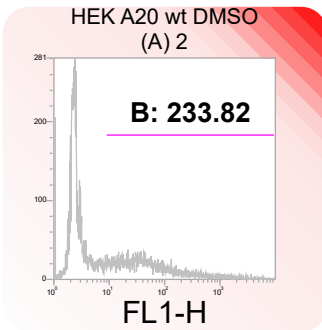

| FCS Key 1       | FCS Key 2 | Gate | Region | Count | %Gated | X Median | X Mean | Error Message |
|-----------------|-----------|------|--------|-------|--------|----------|--------|---------------|
| HEK A20 wt DMSO |           | A B  |        | 7941  | 39.05  | 41.42    | 233.82 |               |

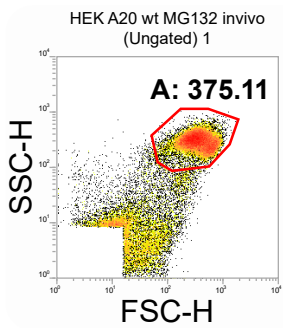

| FCS Key 1               | FCS Key 2 | Gate      | Region | Count | %Gated | X Median | X Mean | Error Message |
|-------------------------|-----------|-----------|--------|-------|--------|----------|--------|---------------|
| HEK A20 wt MG132 invivo |           | Ungated A |        | 20372 | 60.69  | 339.82   | 375.11 |               |

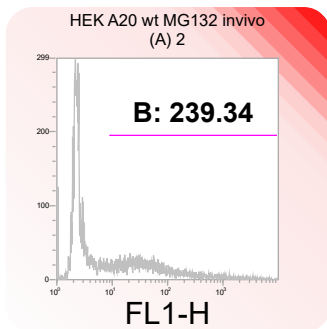

| FCS Key 1               | FCS Key 2 | Gate | Region | Count | %Gated | X Median | X Mean | Error Message |
|-------------------------|-----------|------|--------|-------|--------|----------|--------|---------------|
| HEK A20 wt MG132 invivo |           | A B  |        | 7427  | 36.46  | 42.17    | 239.34 |               |

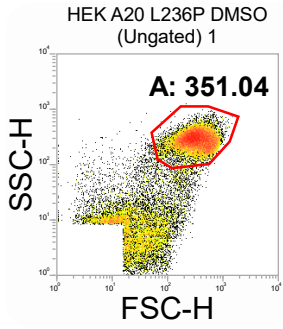

| FCS Key 1     | FCS Key 2 | Gate    | Region | Count | %Gated | X Median | X Mean | Error Message |
|---------------|-----------|---------|--------|-------|--------|----------|--------|---------------|
| HEK A20 L236P | DMSO      | Ungated | A      | 20413 | 59.81  | 316.23   | 351.04 |               |

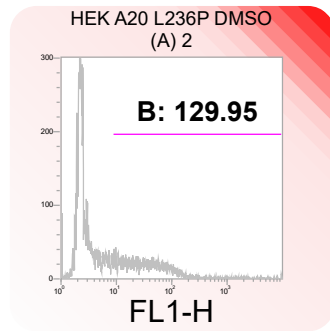

| FCS Key 1     | FCS Key 2 | Gate | Region | Count | %Gated | X Median | X Mean | Error Message |
|---------------|-----------|------|--------|-------|--------|----------|--------|---------------|
| HEK A20 L236P | DMSO      | A    | B      | 6363  | 31.17  | 33.38    | 129.95 |               |

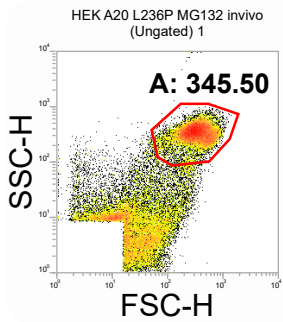

| FCS Key 1     | FCS Key 2    | Gate    | Region | Count | %Gated | X Median | X Mean | Error Message |
|---------------|--------------|---------|--------|-------|--------|----------|--------|---------------|
| HEK A20 L236P | MG132 invivo | Ungated | A      | 20511 | 45.14  | 313.40   | 345.50 |               |

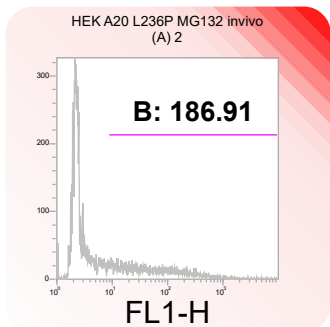

| FCS Key 1     | FCS Key 2    | Gate | Region | Count | %Gated | X Median | X Mean | Error Message |
|---------------|--------------|------|--------|-------|--------|----------|--------|---------------|
| HEK A20 L236P | MG132 invivo | A    | B      | 6381  | 31.11  | 47.40    | 186.91 |               |



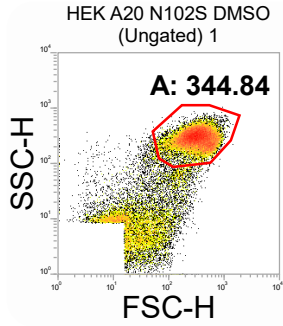

| FCS Key 1     | FCS Key 2 | Gate    | Region | Count | %Gated | X Median | X Mean | Error Message |
|---------------|-----------|---------|--------|-------|--------|----------|--------|---------------|
| HEK A20 N102S | DMSO      | Ungated | A      | 20608 | 62.42  | 313.40   | 344.84 |               |

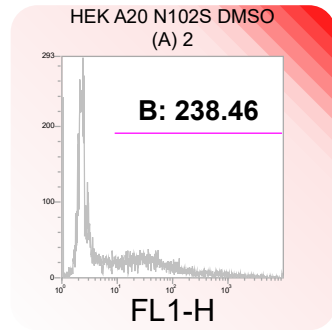

| FCS Key 1     | FCS Key 2 | Gate | Region | Count | %Gated | X Median | X Mean | Error Message |
|---------------|-----------|------|--------|-------|--------|----------|--------|---------------|
| HEK A20 N102S | DMSO      | A    | B      | 7971  | 38.68  | 42.55    | 238.46 |               |

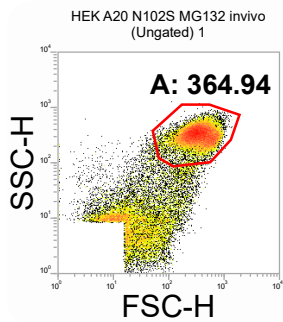

| FCS Key 1     | FCS Key 2    | Gate    | Region | Count | %Gated | X Median | X Mean | Error Message |
|---------------|--------------|---------|--------|-------|--------|----------|--------|---------------|
| HEK A20 N102S | MG132 invivo | Ungated | A      | 20422 | 56.46  | 330.77   | 364.94 |               |

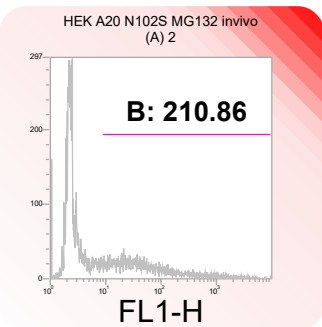

| FCS Key 1     | FCS Key 2    | Gate | Region | Count | %Gated | X Median | X Mean | Error Message |
|---------------|--------------|------|--------|-------|--------|----------|--------|---------------|
| HEK A20 N102S | MG132 invivo | A    | B      | 7292  | 35.71  | 40.32    | 210.86 |               |

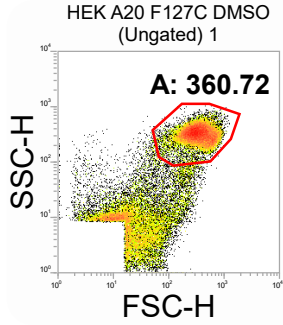

| FCS Key 1          | FCS Key 2 | Gate      | Region | Count | %Gated | X Median | X Mean | Error Message |
|--------------------|-----------|-----------|--------|-------|--------|----------|--------|---------------|
| HEK A20 F127C DMSO |           | Ungated A | A      | 20437 | 51.84  | 324.88   | 360.72 |               |

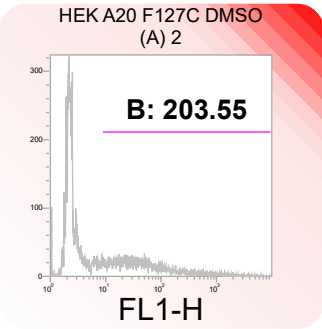

| FCS Key 1          | FCS Key 2 | Gate | Region | Count | %Gated | X Median | X Mean | Error Message |
|--------------------|-----------|------|--------|-------|--------|----------|--------|---------------|
| HEK A20 F127C DMSO |           | A    | B      | 7042  | 34.46  | 39.60    | 203.55 |               |

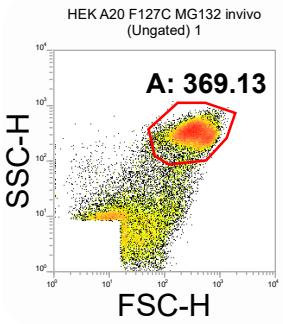

| FCS Key 1                  | FCS Key 2 | Gate      | Region | Count | %Gated | X Median | X Mean | Error Message |
|----------------------------|-----------|-----------|--------|-------|--------|----------|--------|---------------|
| HEK A20 F127C MG132 invivo |           | Ungated A | A      | 20502 | 56.35  | 336.78   | 369.13 |               |

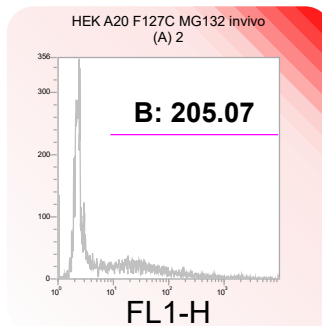

| FCS Key 1                  | FCS Key 2 | Gate | Region | Count | %Gated | X Median | X Mean | Error Message |
|----------------------------|-----------|------|--------|-------|--------|----------|--------|---------------|
| HEK A20 F127C MG132 invivo |           | A    | B      | 7064  | 34.46  | 38.89    | 205.07 |               |

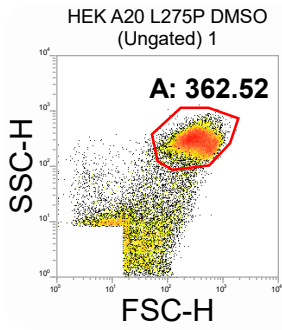

| FCS Key 1     | FCS Key 2 | Gate      | Region | Count | %Gated | X Median | X Mean | Error Message |
|---------------|-----------|-----------|--------|-------|--------|----------|--------|---------------|
| HEK A20 L275P | DMSO      | Ungated A |        | 20291 | 63.47  | 327.81   | 362.52 |               |

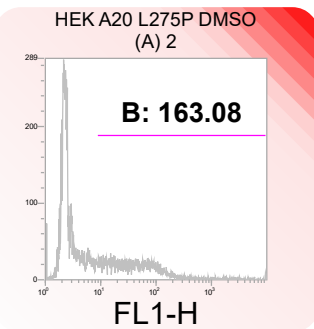

| FCS Key 1     | FCS Key 2 | Gate | Region | Count | %Gated | X Median | X Mean | Error Message |
|---------------|-----------|------|--------|-------|--------|----------|--------|---------------|
| HEK A20 L275P | DMSO      | A B  |        | 6944  | 34.22  | 38.89    | 163.08 |               |

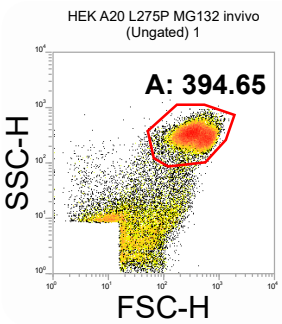

| FCS Key 1     | FCS Key 2    | Gate      | Region | Count | %Gated | X Median | X Mean | Error Message |
|---------------|--------------|-----------|--------|-------|--------|----------|--------|---------------|
| HEK A20 L275P | MG132 invivo | Ungated A |        | 20233 | 56.41  | 361.90   | 394.65 |               |

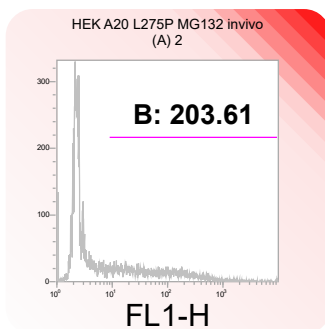

| FCS Key 1     | FCS Key 2    | Gate | Region | Count | %Gated | X Median | X Mean | Error Message |
|---------------|--------------|------|--------|-------|--------|----------|--------|---------------|
| HEK A20 L275P | MG132 invivo | A B  |        | 6811  | 33.66  | 55.23    | 203.61 |               |

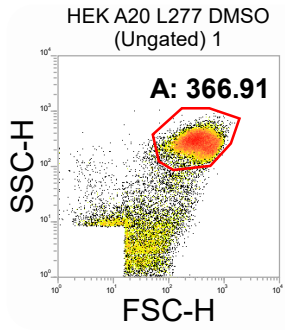

| FCS Key 1    | FCS Key 2 | Gate      | Region | Count | %Gated | X Median | X Mean | Error Message |
|--------------|-----------|-----------|--------|-------|--------|----------|--------|---------------|
| HEK A20 L277 | DMSO      | Ungated A | A      | 20326 | 65.97  | 330.77   | 366.91 |               |

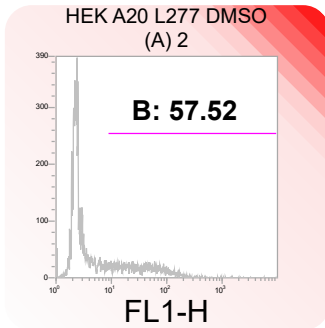

| FCS Key 1    | FCS Key 2 | Gate | Region | Count | %Gated | X Median | X Mean | Error Message |
|--------------|-----------|------|--------|-------|--------|----------|--------|---------------|
| HEK A20 L277 | DMSO      | A    | B      | 5508  | 27.10  | 31.62    | 57.52  |               |

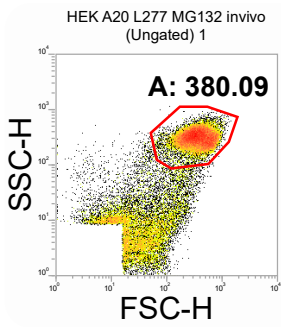

| FCS Key 1    | FCS Key 2    | Gate      | Region | Count | %Gated | X Median | X Mean | Error Message |
|--------------|--------------|-----------|--------|-------|--------|----------|--------|---------------|
| HEK A20 L277 | MG132 invivo | Ungated A | A      | 20278 | 56.96  | 345.99   | 380.09 |               |

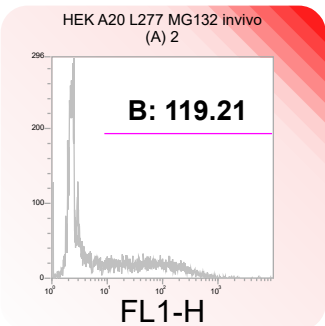

| FCS Key 1    | FCS Key 2    | Gate | Region | Count | %Gated | X Median | X Mean | Error Message |
|--------------|--------------|------|--------|-------|--------|----------|--------|---------------|
| HEK A20 L277 | MG132 invivo | A    | B      | 7679  | 37.87  | 54.74    | 119.21 |               |
