# Supplementary material for: A critical region of A20 unveiled by missense TNFAIP3 variations that lead to autoinflammation
Source: eLife journal article supplement (doi:10.7554/elife.81280), 2023-06-06
Supplement: fig4-data2 [file elife-81280-fig4-data2-v1.pdf]

Results <Default Table>

| FCS Key 1     | FCS Key 2    | Gate    | Region | Count | %Gated | X Median | X Mean | Error Message |
|---------------|--------------|---------|--------|-------|--------|----------|--------|---------------|
| HEK NT        | no trt       | Ungated | A      | 21062 | 59.06  | 327.81   | 342.47 |               |
| HEK NT        | no trt       | A       | B      | 31    | 0.15   | 38.54    | 127.05 |               |
| HEK EV        | DMSO         | Ungated | A      | 20277 | 62.25  | 381.97   | 398.62 |               |
| HEK EV        | DMSO         | A       | B      | 20    | 0.10   | 38.89    | 277.70 |               |
| HEK EV        | MG132 invivo | Ungated | A      | 20282 | 55.93  | 352.27   | 374.79 |               |
| HEK EV        | MG132 invivo | A       | B      | 15    | 0.07   | 19.63    | 42.20  |               |
| HEK EGFP      | DMSO         | Ungated | A      | 20346 | 65.18  | 358.66   | 375.31 |               |
| HEK EGFP      | DMSO         | A       | B      | 9469  | 46.54  | 137.00   | 747.57 |               |
| HEK EGFP      | MG132 invivo | Ungated | A      | 20258 | 57.69  | 368.47   | 388.15 |               |
| HEK EGFP      | MG132 invivo | A       | B      | 8866  | 43.77  | 114.44   | 626.50 |               |
| HEK A20 wt    | DMSO         | Ungated | A      | 20325 | 66.35  | 352.27   | 374.35 |               |
| HEK A20 wt    | DMSO         | A       | B      | 10400 | 51.17  | 46.56    | 308.52 |               |
| HEK A20 wt    | MG132 invivo | Ungated | A      | 20530 | 54.50  | 330.77   | 347.53 |               |
| HEK A20 wt    | MG132 invivo | A       | B      | 9922  | 48.33  | 42.94    | 292.49 |               |
| HEK A20 L236P | DMSO         | Ungated | A      | 20482 | 66.00  | 342.89   | 362.62 |               |
| HEK A20 L236P | DMSO         | A       | B      | 6114  | 29.85  | 31.91    | 149.91 |               |
| HEK A20 L236P | MG132 invivo | Ungated | A      | 20295 | 56.05  | 358.66   | 385.22 |               |
| HEK A20 L236P | MG132 invivo | A       | B      | 6974  | 34.36  | 45.32    | 214.49 |               |
| HEK A20 N102S | DMSO         | Ungated | A      | 20359 | 68.67  | 345.99   | 364.06 |               |
| HEK A20 N102S | DMSO         | A       | B      | 9710  | 47.69  | 44.91    | 299.71 |               |
| HEK A20 N102S | MG132 invivo | Ungated | A      | 20260 | 52.72  | 355.45   | 377.89 |               |
| HEK A20 N102S | MG132 invivo | A       | B      | 8913  | 43.99  | 42.17    | 259.96 |               |
| HEK A20 F127C | DMSO         | Ungated | A      | 20554 | 64.79  | 321.97   | 343.90 |               |
| HEK A20 F127C | DMSO         | A       | B      | 9044  | 44.00  | 39.60    | 229.59 |               |
| HEK A20 F127C | MG132 invivo | Ungated | A      | 20449 | 57.75  | 355.45   | 374.06 |               |
| HEK A20 F127C | MG132 invivo | A       | B      | 8590  | 42.01  | 39.60    | 253.90 |               |
| HEK A20 L275P | DMSO         | Ungated | A      | 20255 | 66.41  | 349.12   | 375.28 |               |
| HEK A20 L275P | DMSO         | A       | B      | 5584  | 27.57  | 28.90    | 125.93 |               |
| HEK A20 L275P | MG132 invivo | Ungated | A      | 20433 | 46.78  | 361.90   | 392.25 |               |
| HEK A20 L275P | MG132 invivo | A       | B      | 6615  | 32.37  | 39.60    | 165.89 |               |
| HEK A20 L277  | DMSO         | Ungated | A      | 20190 | 67.99  | 371.80   | 399.74 |               |
| HEK A20 L277  | DMSO         | A       | B      | 6432  | 31.86  | 31.62    | 60.19  |               |
| HEK A20 L277  | MG132 invivo | Ungated | A      | 20352 | 39.04  | 371.80   | 396.64 |               |
| HEK A20 L277  | MG132 invivo | A       | B      | 8171  | 40.15  | 50.03    | 115.53 |               |

Overlay 1

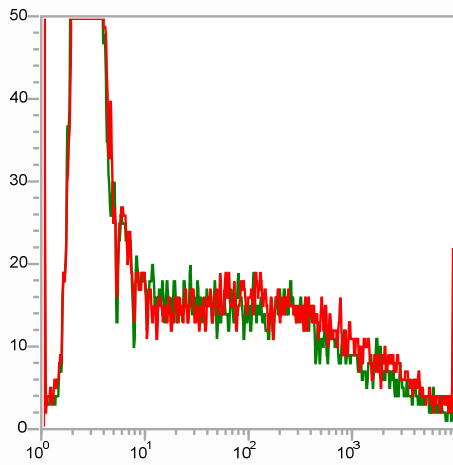

- HEK EGFP DMSO
- HEK EGFP MG132 invivo

FL1-H

Overlay 2

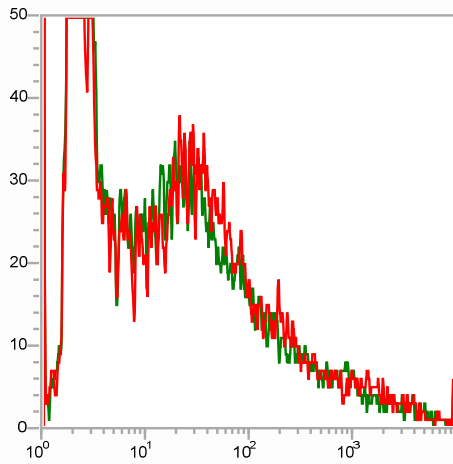

- HEK A20 wt DMSO
- HEK A20 wt MG132 invivo

FL1-H

Overlay 3

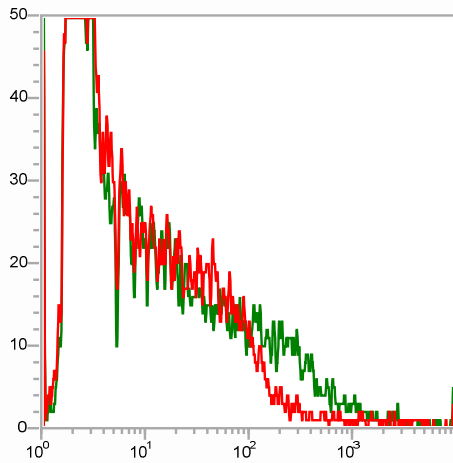

- HEK A20 L236P DMSO
- HEK A20 L236P MG132 invivo

FL1-H

Overlay 4

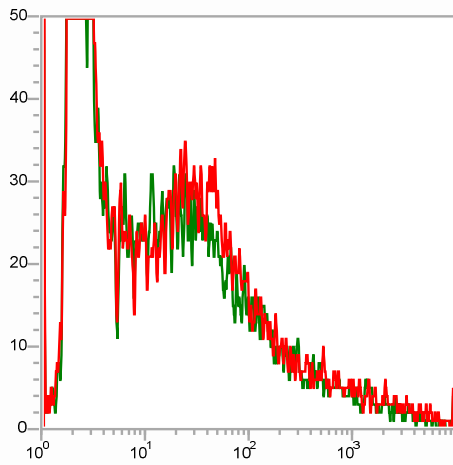

HEK A20 N102S DMSO  
HEK A20 N102S MG132 invivo

FL1-H

Overlay 5

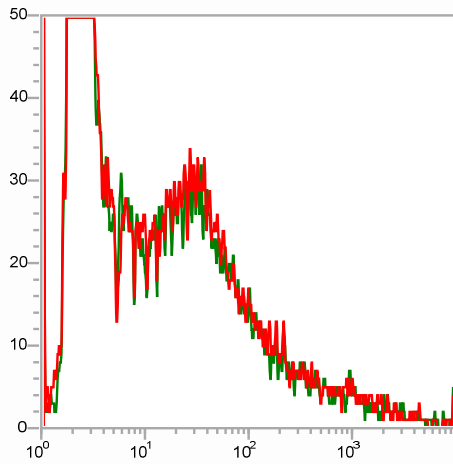

HEK A20 F127C DMSO  
HEK A20 F127C MG132 invivo

FL1-H

Overlay 6

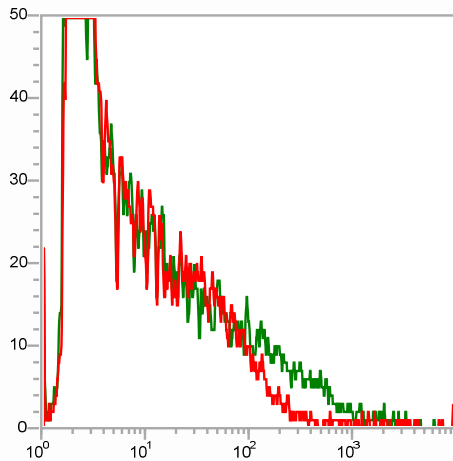

HEK A20 L275P DMSO  
HEK A20 L275P MG132 invivo

FL1-H

### Overlay 7

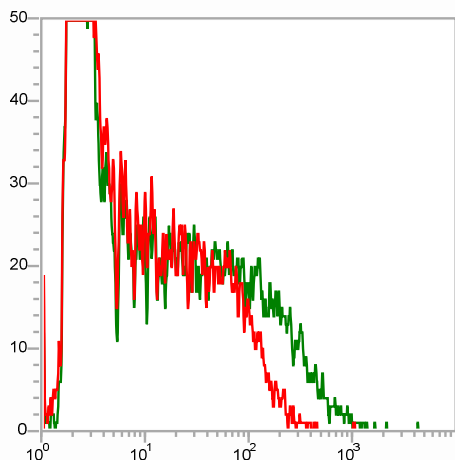

█ HEK A20 L277 DMSO  
█ HEK A20 L277 MG132 invivo

FL1-H

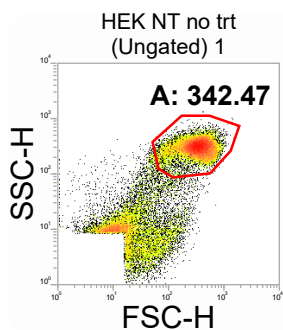

| FCS Key 1 | FCS Key 2 | Gate      | Region | Count | %Gated | X Median | X Mean | Error Message |
|-----------|-----------|-----------|--------|-------|--------|----------|--------|---------------|
| HEK NT    | no trt    | Ungated A | A      | 21062 | 59.06  | 327.81   | 342.47 |               |

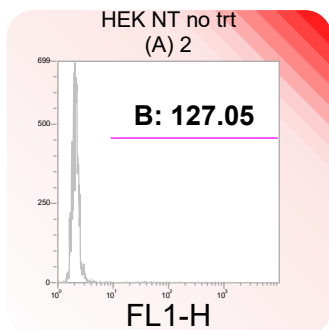

| FCS Key 1 | FCS Key 2 | Gate | Region | Count | %Gated | X Median | X Mean | Error Message |
|-----------|-----------|------|--------|-------|--------|----------|--------|---------------|
| HEK NT    | no trt    | A    | B      | 31    | 0.15   | 38.54    | 127.05 |               |

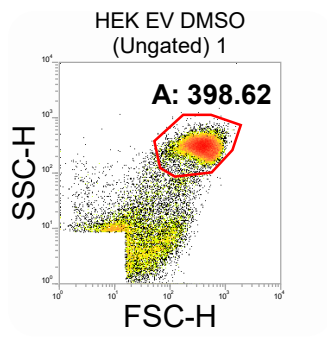

| FCS Key 1 | FCS Key 2 | Gate    | Region | Count | %Gated | X Median | X Mean | Error Message |
|-----------|-----------|---------|--------|-------|--------|----------|--------|---------------|
| HEK EV    | DMSO      | Ungated | A      | 20277 | 62.25  | 381.97   | 398.62 |               |

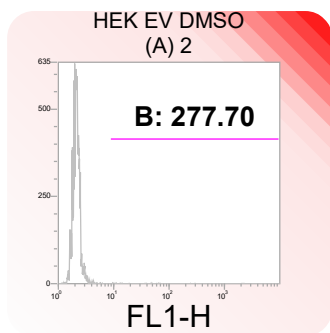

| FCS Key 1 | FCS Key 2 | Gate | Region | Count | %Gated | X Median | X Mean | Error Message |
|-----------|-----------|------|--------|-------|--------|----------|--------|---------------|
| HEK EV    | DMSO      | A    | B      | 20    | 0.10   | 38.89    | 277.70 |               |

X mean is 277.7 because of 1 cell which is around 900  
 Checked with lucie  
 Most likely a cell that jumped from the EGFP well

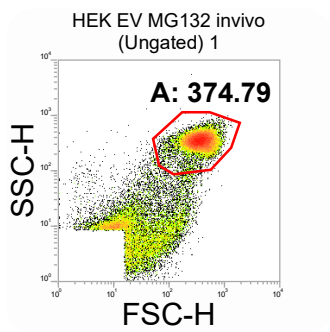

| FCS Key 1 | FCS Key 2    | Gate    | Region | Count | %Gated | X Median | X Mean | Error Message |
|-----------|--------------|---------|--------|-------|--------|----------|--------|---------------|
| HEK EV    | MG132 invivo | Ungated | A      | 20282 | 55.93  | 352.27   | 374.79 |               |

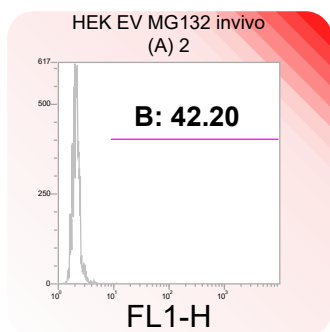

| FCS Key 1 | FCS Key 2    | Gate | Region | Count | %Gated | X Median | X Mean | Error Message |
|-----------|--------------|------|--------|-------|--------|----------|--------|---------------|
| HEK EV    | MG132 invivo | A    | B      | 15    | 0.07   | 19.63    | 42.20  |               |

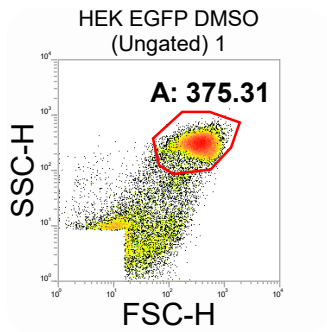

| FCS Key 1     | FCS Key 2 | Gate      | Region | Count | %Gated | X Median | X Mean | Error Message |
|---------------|-----------|-----------|--------|-------|--------|----------|--------|---------------|
| HEK EGFP DMSO |           | Ungated A |        | 20346 | 65.18  | 358.66   | 375.31 |               |

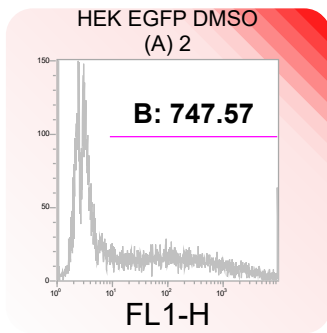

| FCS Key 1     | FCS Key 2 | Gate | Region | Count | %Gated | X Median | X Mean | Error Message |
|---------------|-----------|------|--------|-------|--------|----------|--------|---------------|
| HEK EGFP DMSO |           | A B  |        | 9469  | 46.54  | 137.00   | 747.57 |               |

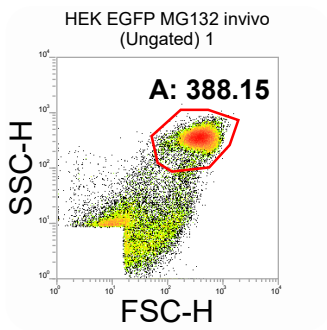

| FCS Key 1             | FCS Key 2 | Gate      | Region | Count | %Gated | X Median | X Mean | Error Message |
|-----------------------|-----------|-----------|--------|-------|--------|----------|--------|---------------|
| HEK EGFP MG132 invivo |           | Ungated A |        | 20258 | 57.69  | 368.47   | 388.15 |               |

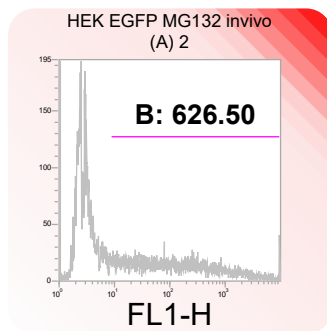

| FCS Key 1             | FCS Key 2 | Gate | Region | Count | %Gated | X Median | X Mean | Error Message |
|-----------------------|-----------|------|--------|-------|--------|----------|--------|---------------|
| HEK EGFP MG132 invivo |           | A B  |        | 8866  | 43.77  | 114.44   | 626.50 |               |

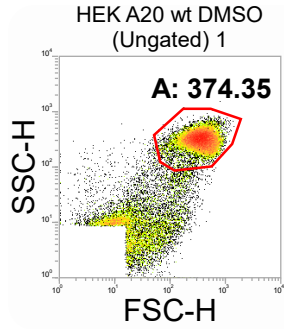

| FCS Key 1       | FCS Key 2 | Gate      | Region | Count | %Gated | X Median | X Mean | Error Message |
|-----------------|-----------|-----------|--------|-------|--------|----------|--------|---------------|
| HEK A20 wt DMSO |           | Ungated A |        | 20325 | 66.35  | 352.27   | 374.35 |               |

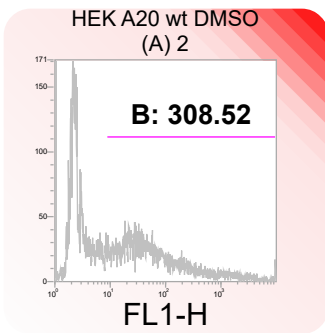

| FCS Key 1       | FCS Key 2 | Gate | Region | Count | %Gated | X Median | X Mean | Error Message |
|-----------------|-----------|------|--------|-------|--------|----------|--------|---------------|
| HEK A20 wt DMSO |           | A B  |        | 10400 | 51.17  | 46.56    | 308.52 |               |

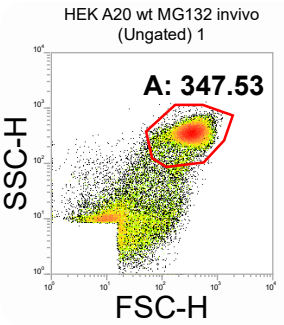

| FCS Key 1               | FCS Key 2 | Gate      | Region | Count | %Gated | X Median | X Mean | Error Message |
|-------------------------|-----------|-----------|--------|-------|--------|----------|--------|---------------|
| HEK A20 wt MG132 invivo |           | Ungated A |        | 20530 | 54.50  | 330.77   | 347.53 |               |

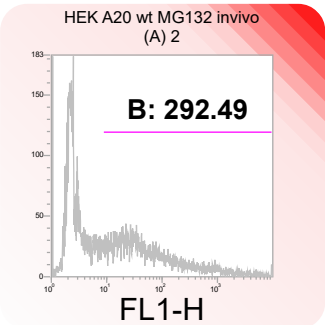

| FCS Key 1               | FCS Key 2 | Gate | Region | Count | %Gated | X Median | X Mean | Error Message |
|-------------------------|-----------|------|--------|-------|--------|----------|--------|---------------|
| HEK A20 wt MG132 invivo |           | A B  |        | 9922  | 48.33  | 42.94    | 292.49 |               |

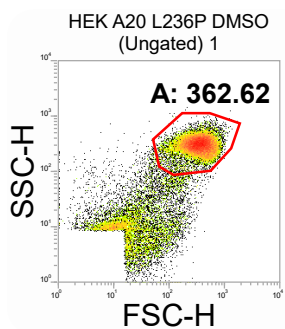

| FCS Key 1     | FCS Key 2 | Gate    | Region | Count | %Gated | X Median | X Mean | Error Message |
|---------------|-----------|---------|--------|-------|--------|----------|--------|---------------|
| HEK A20 L236P | DMSO      | Ungated | A      | 20482 | 66.00  | 342.89   | 362.62 |               |

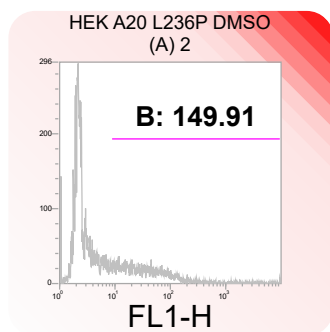

| FCS Key 1     | FCS Key 2 | Gate | Region | Count | %Gated | X Median | X Mean | Error Message |
|---------------|-----------|------|--------|-------|--------|----------|--------|---------------|
| HEK A20 L236P | DMSO      | A    | B      | 6114  | 29.85  | 31.91    | 149.91 |               |

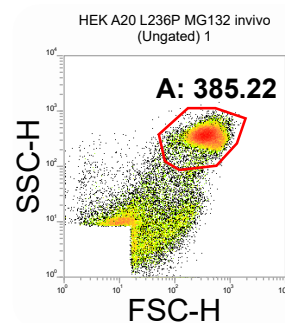

| FCS Key 1     | FCS Key 2    | Gate    | Region | Count | %Gated | X Median | X Mean | Error Message |
|---------------|--------------|---------|--------|-------|--------|----------|--------|---------------|
| HEK A20 L236P | MG132 invivo | Ungated | A      | 20295 | 56.05  | 358.66   | 385.22 |               |

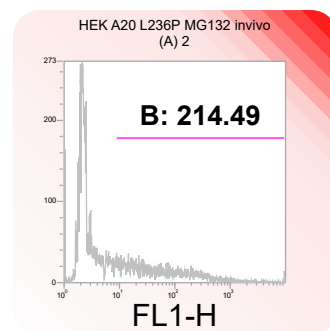

| FCS Key 1     | FCS Key 2    | Gate | Region | Count | %Gated | X Median | X Mean | Error Message |
|---------------|--------------|------|--------|-------|--------|----------|--------|---------------|
| HEK A20 L236P | MG132 invivo | A    | B      | 6974  | 34.36  | 45.32    | 214.49 |               |



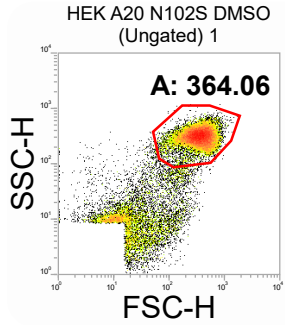

| FCS Key 1     | FCS Key 2 | Gate    | Region | Count | %Gated | X Median | X Mean | Error Message |
|---------------|-----------|---------|--------|-------|--------|----------|--------|---------------|
| HEK A20 N102S | DMSO      | Ungated | A      | 20359 | 68.67  | 345.99   | 364.06 |               |

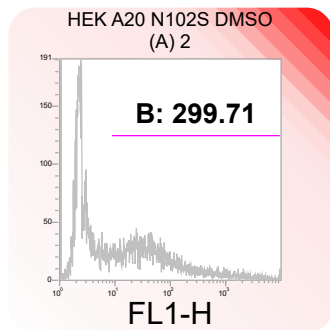

| FCS Key 1     | FCS Key 2 | Gate | Region | Count | %Gated | X Median | X Mean | Error Message |
|---------------|-----------|------|--------|-------|--------|----------|--------|---------------|
| HEK A20 N102S | DMSO      | A    | B      | 9710  | 47.69  | 44.91    | 299.71 |               |

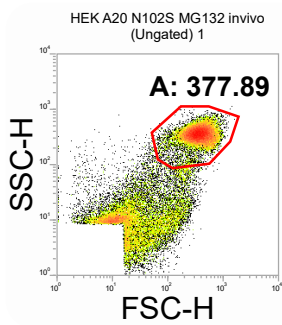

| FCS Key 1     | FCS Key 2    | Gate    | Region | Count | %Gated | X Median | X Mean | Error Message |
|---------------|--------------|---------|--------|-------|--------|----------|--------|---------------|
| HEK A20 N102S | MG132 invivo | Ungated | A      | 20260 | 52.72  | 355.45   | 377.89 |               |

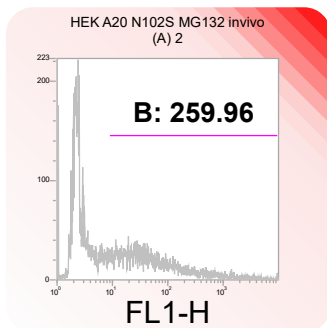

| FCS Key 1     | FCS Key 2    | Gate | Region | Count | %Gated | X Median | X Mean | Error Message |
|---------------|--------------|------|--------|-------|--------|----------|--------|---------------|
| HEK A20 N102S | MG132 invivo | A    | B      | 8913  | 43.99  | 42.17    | 259.96 |               |

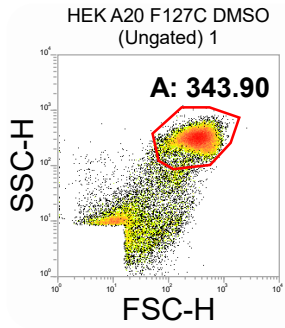

| FCS Key 1          | FCS Key 2 | Gate      | Region | Count | %Gated | X Median | X Mean | Error Message |
|--------------------|-----------|-----------|--------|-------|--------|----------|--------|---------------|
| HEK A20 F127C DMSO |           | Ungated A |        | 20554 | 64.79  | 321.97   | 343.90 |               |

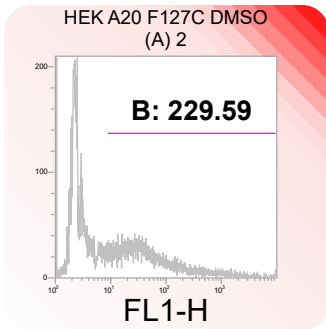

| FCS Key 1          | FCS Key 2 | Gate | Region | Count | %Gated | X Median | X Mean | Error Message |
|--------------------|-----------|------|--------|-------|--------|----------|--------|---------------|
| HEK A20 F127C DMSO |           | A B  |        | 9044  | 44.00  | 39.60    | 229.59 |               |

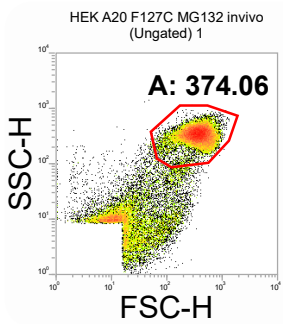

| FCS Key 1                  | FCS Key 2 | Gate      | Region | Count | %Gated | X Median | X Mean | Error Message |
|----------------------------|-----------|-----------|--------|-------|--------|----------|--------|---------------|
| HEK A20 F127C MG132 invivo |           | Ungated A |        | 20449 | 57.75  | 355.45   | 374.06 |               |

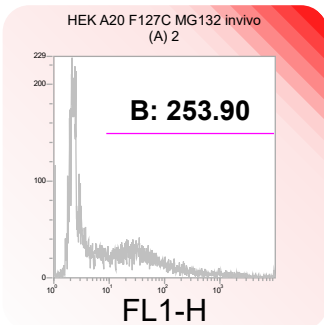

| FCS Key 1                  | FCS Key 2 | Gate | Region | Count | %Gated | X Median | X Mean | Error Message |
|----------------------------|-----------|------|--------|-------|--------|----------|--------|---------------|
| HEK A20 F127C MG132 invivo |           | A B  |        | 8590  | 42.01  | 39.60    | 253.90 |               |

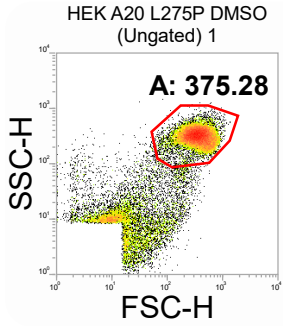

| FCS Key 1     | FCS Key 2 | Gate    | Region | Count | %Gated | X Median | X Mean | Error Message |
|---------------|-----------|---------|--------|-------|--------|----------|--------|---------------|
| HEK A20 L275P | DMSO      | Ungated | A      | 20255 | 66.41  | 349.12   | 375.28 |               |

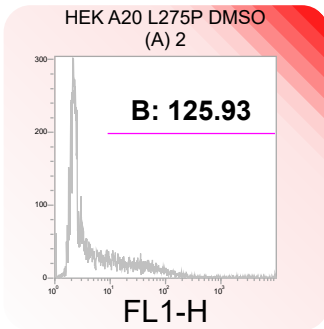

| FCS Key 1     | FCS Key 2 | Gate | Region | Count | %Gated | X Median | X Mean | Error Message |
|---------------|-----------|------|--------|-------|--------|----------|--------|---------------|
| HEK A20 L275P | DMSO      | A    | B      | 5584  | 27.57  | 28.90    | 125.93 |               |

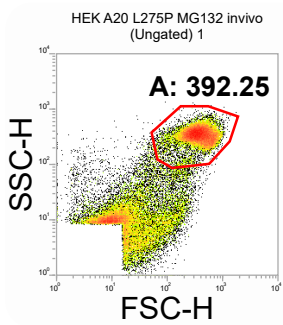

| FCS Key 1     | FCS Key 2    | Gate    | Region | Count | %Gated | X Median | X Mean | Error Message |
|---------------|--------------|---------|--------|-------|--------|----------|--------|---------------|
| HEK A20 L275P | MG132 invivo | Ungated | A      | 20433 | 46.78  | 361.90   | 392.25 |               |

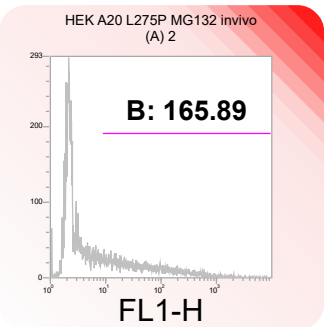

| FCS Key 1     | FCS Key 2    | Gate | Region | Count | %Gated | X Median | X Mean | Error Message |
|---------------|--------------|------|--------|-------|--------|----------|--------|---------------|
| HEK A20 L275P | MG132 invivo | A    | B      | 6615  | 32.37  | 39.60    | 165.89 |               |

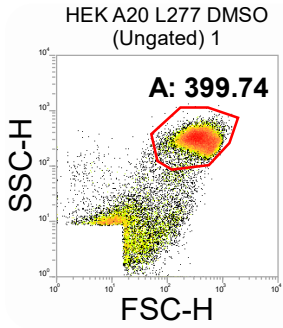

| FCS Key 1    | FCS Key 2 | Gate    | Region | Count | %Gated | X Median | X Mean | Error Message |
|--------------|-----------|---------|--------|-------|--------|----------|--------|---------------|
| HEK A20 L277 | DMSO      | Ungated | A      | 20190 | 67.99  | 371.80   | 399.74 |               |

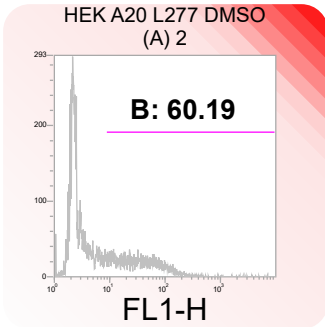

| FCS Key 1    | FCS Key 2 | Gate | Region | Count | %Gated | X Median | X Mean | Error Message |
|--------------|-----------|------|--------|-------|--------|----------|--------|---------------|
| HEK A20 L277 | DMSO      | A    | B      | 6432  | 31.86  | 31.62    | 60.19  |               |

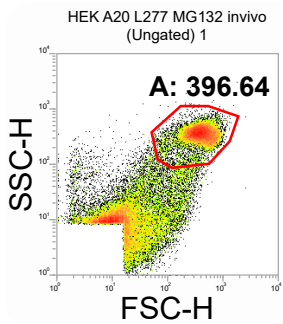

| FCS Key 1    | FCS Key 2    | Gate    | Region | Count | %Gated | X Median | X Mean | Error Message |
|--------------|--------------|---------|--------|-------|--------|----------|--------|---------------|
| HEK A20 L277 | MG132 invivo | Ungated | A      | 20352 | 39.04  | 371.80   | 396.64 |               |

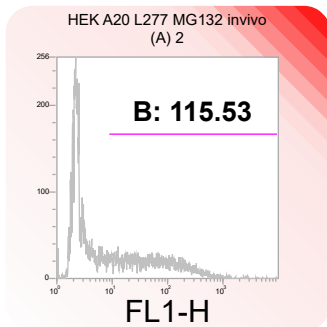

| FCS Key 1    | FCS Key 2    | Gate | Region | Count | %Gated | X Median | X Mean | Error Message |
|--------------|--------------|------|--------|-------|--------|----------|--------|---------------|
| HEK A20 L277 | MG132 invivo | A    | B      | 8171  | 40.15  | 50.03    | 115.53 |               |
