# Supplementary material for: A critical region of A20 unveiled by missense TNFAIP3 variations that lead to autoinflammation
Source: eLife journal article supplement (doi:10.7554/elife.81280), 2023-06-06
Supplement: fig4-data3 [file elife-81280-fig4-data3-v1.pdf]

Results <Default Table>

| FCS Key 1     | FCS Key 2    | Gate    | Region | Count | %Gated | X Median | X Mean | Error Message |
|---------------|--------------|---------|--------|-------|--------|----------|--------|---------------|
| HEK NT        | no trt       | Ungated | A      | 20405 | 67.03  | 352.27   | 367.27 |               |
| HEK NT        | no trt       | A       | B      | 0     | 0.00   | ERROR    | ERROR  |               |
| HEK EV        | DMSO         | Ungated | A      | 20345 | 67.10  | 358.66   | 373.04 |               |
| HEK EV        | DMSO         | A       | B      | 3     | 0.01   | 47.83    | 39.70  |               |
| HEK EV        | MG132 invivo | Ungated | A      | 20231 | 56.98  | 375.16   | 394.33 |               |
| HEK EV        | MG132 invivo | A       | B      | 0     | 0.00   | ERROR    | ERROR  |               |
| HEK EGFP      | DMSO         | Ungated | A      | 20236 | 66.69  | 381.97   | 397.50 |               |
| HEK EGFP      | DMSO         | A       | B      | 6087  | 30.08  | 127.49   | 682.88 |               |
| HEK EGFP      | MG132 invivo | Ungated | A      | 20264 | 57.86  | 388.91   | 408.50 |               |
| HEK EGFP      | MG132 invivo | A       | B      | 5651  | 27.89  | 106.50   | 636.63 |               |
| HEK A20 wt    | DMSO         | Ungated | A      | 20162 | 68.33  | 378.55   | 397.79 |               |
| HEK A20 wt    | DMSO         | A       | B      | 5568  | 27.62  | 35.55    | 218.81 |               |
| HEK A20 wt    | MG132 invivo | Ungated | A      | 20192 | 59.55  | 399.54   | 419.06 |               |
| HEK A20 wt    | MG132 invivo | A       | B      | 5651  | 27.99  | 34.29    | 198.08 |               |
| HEK A20 L236P | DMSO         | Ungated | A      | 20496 | 61.34  | 378.55   | 390.55 |               |
| HEK A20 L236P | DMSO         | A       | B      | 4784  | 23.34  | 30.23    | 128.39 |               |
| HEK A20 L236P | MG132 invivo | Ungated | A      | 20449 | 53.46  | 365.17   | 382.80 |               |
| HEK A20 L236P | MG132 invivo | A       | B      | 5083  | 24.86  | 41.05    | 174.51 |               |
| HEK A20 N102S | DMSO         | Ungated | A      | 20564 | 59.21  | 375.16   | 388.64 |               |
| HEK A20 N102S | DMSO         | A       | B      | 6169  | 30.00  | 40.32    | 214.90 |               |
| HEK A20 N102S | MG132 invivo | Ungated | A      | 20386 | 70.16  | 355.45   | 372.58 |               |
| HEK A20 N102S | MG132 invivo | A       | B      | 6753  | 33.13  | 36.19    | 206.81 |               |
| HEK A20 F127C | DMSO         | Ungated | A      | 20349 | 62.53  | 392.42   | 408.04 |               |
| HEK A20 F127C | DMSO         | A       | B      | 6802  | 33.43  | 37.18    | 214.24 |               |
| HEK A20 F127C | MG132 invivo | Ungated | A      | 20376 | 51.06  | 365.17   | 383.16 |               |
| HEK A20 F127C | MG132 invivo | A       | B      | 5295  | 25.99  | 32.20    | 168.24 |               |
| HEK A20 L275P | DMSO         | Ungated | A      | 20384 | 62.52  | 375.16   | 389.52 |               |
| HEK A20 L275P | DMSO         | A       | B      | 4825  | 23.67  | 31.34    | 124.67 |               |
| HEK A20 L275P | MG132 invivo | Ungated | A      | 20396 | 52.09  | 365.17   | 385.22 |               |
| HEK A20 L275P | MG132 invivo | A       | B      | 5311  | 26.04  | 46.14    | 185.34 |               |
| HEK A20 L277  | DMSO         | Ungated | A      | 20372 | 70.75  | 352.27   | 379.45 |               |
| HEK A20 L277  | DMSO         | A       | B      | 5074  | 24.91  | 32.20    | 60.49  |               |
| HEK A20 L277  | MG132 invivo | Ungated | A      | 20296 | 60.63  | 395.96   | 422.78 |               |
| HEK A20 L277  | MG132 invivo | A       | B      | 5758  | 28.37  | 45.73    | 106.36 |               |

Overlay 1

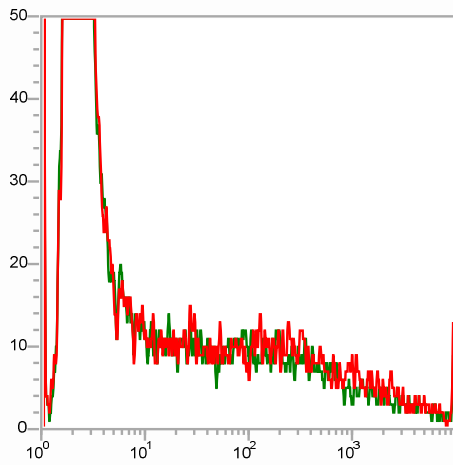

- HEK EGFP DMSO
- HEK EGFP MG132 invivo

FL1-H

Overlay 2

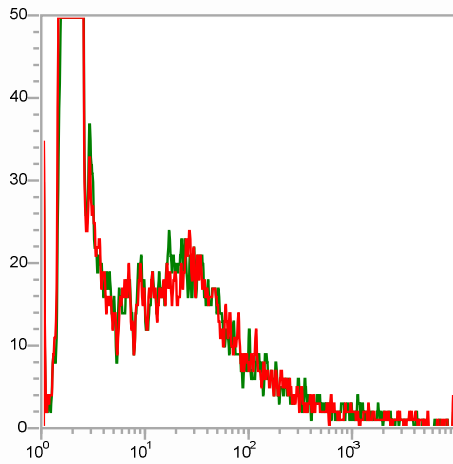

- HEK A20 wt DMSO
- HEK A20 wt MG132 invivo

FL1-H

Overlay 3

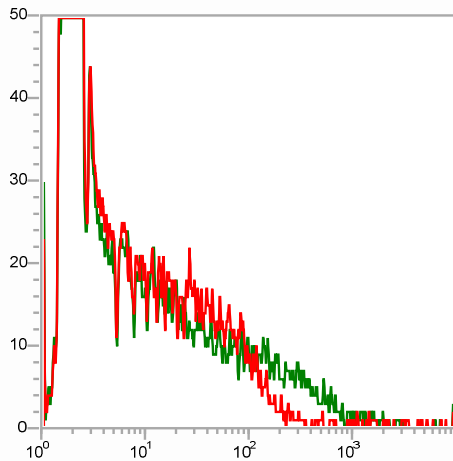

- HEK A20 L236P DMSO
- HEK A20 L236P MG132 invivo

FL1-H

Overlay 4

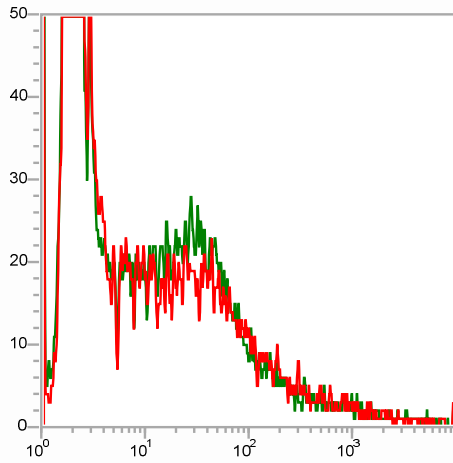

HEK A20 N102S DMSO  
HEK A20 N102S MG132 invivo

FL1-H

Overlay 5

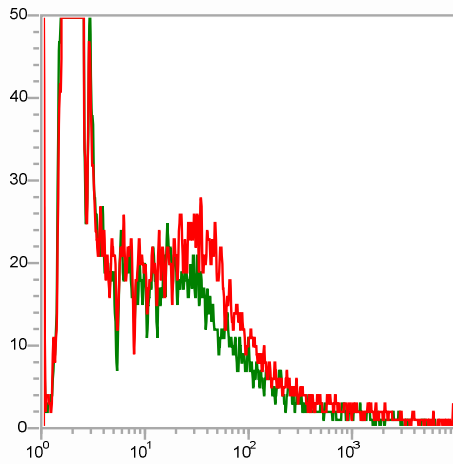

HEK A20 F127C DMSO  
HEK A20 F127C MG132 invivo

FL1-H

Overlay 6

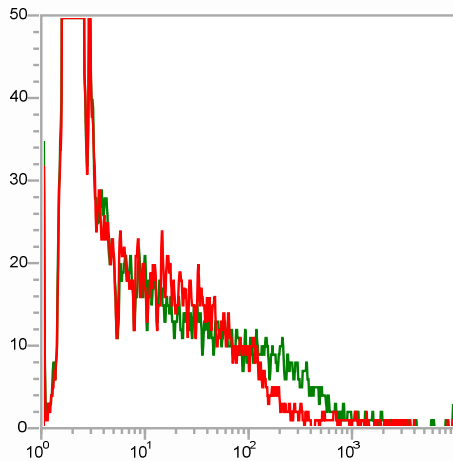

HEK A20 L275P DMSO  
HEK A20 L275P MG132 invivo

FL1-H

### Overlay 7

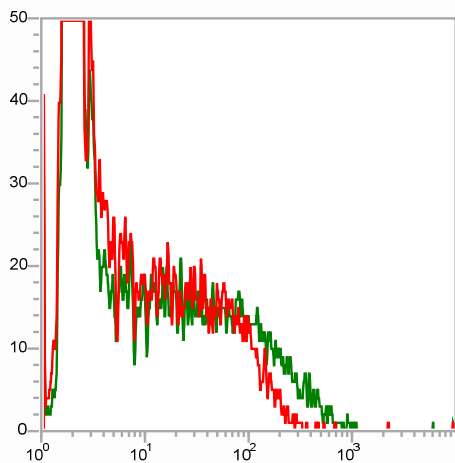

- █ HEK A20 L277 DMSO
- █ HEK A20 L277 MG132 invivo

FL1-H

HEK NT no trt  
(Ungated) 1

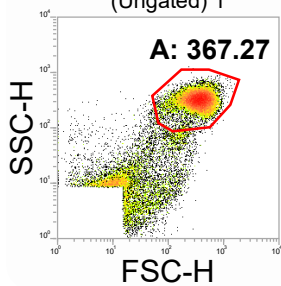

| FCS Key 1 | FCS Key 2 | Gate      | Region | Count | %Gated | X Median | X Mean | Error Message |
|-----------|-----------|-----------|--------|-------|--------|----------|--------|---------------|
| HEK NT    | no trt    | Ungated A |        | 20405 | 67.03  | 352.27   | 367.27 |               |

HEK NT no trt  
(A) 2

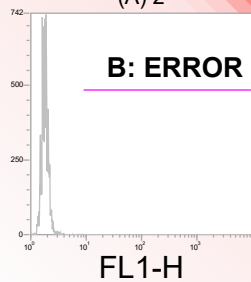

| FCS Key 1 | FCS Key 2 | Gate | Region | Count | %Gated | X Median | X Mean | Error Message |
|-----------|-----------|------|--------|-------|--------|----------|--------|---------------|
| HEK NT    | no trt    | A B  |        | 0     | 0.00   | ERROR    | ERROR  |               |

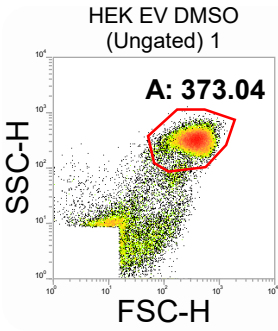

| FCS Key 1 | FCS Key 2 | Gate      | Region | Count | %Gated | X Median | X Mean | Error Message |
|-----------|-----------|-----------|--------|-------|--------|----------|--------|---------------|
| HEK EV    | DMSO      | Ungated A |        | 20345 | 67.10  | 358.66   | 373.04 |               |

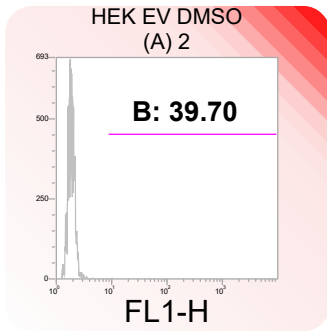

| FCS Key 1 | FCS Key 2 | Gate | Region | Count | %Gated | X Median | X Mean | Error Message |
|-----------|-----------|------|--------|-------|--------|----------|--------|---------------|
| HEK EV    | DMSO      | A B  |        | 3     | 0.01   | 47.83    | 39.70  |               |

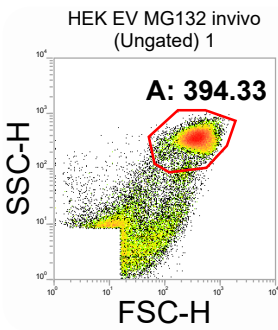

| FCS Key 1 | FCS Key 2    | Gate      | Region | Count | %Gated | X Median | X Mean | Error Message |
|-----------|--------------|-----------|--------|-------|--------|----------|--------|---------------|
| HEK EV    | MG132 invivo | Ungated A |        | 20231 | 56.98  | 375.16   | 394.33 |               |

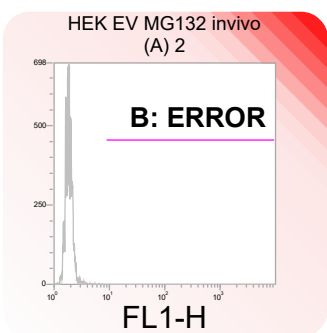

| FCS Key 1 | FCS Key 2    | Gate | Region | Count | %Gated | X Median | X Mean | Error Message |
|-----------|--------------|------|--------|-------|--------|----------|--------|---------------|
| HEK EV    | MG132 invivo | A B  |        | 0     | 0.00   | ERROR    | ERROR  |               |

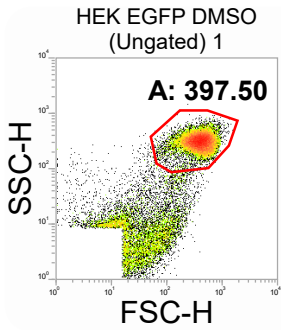

| FCS Key 1     | FCS Key 2 | Gate      | Region | Count | %Gated | X Median | X Mean | Error Message |
|---------------|-----------|-----------|--------|-------|--------|----------|--------|---------------|
| HEK EGFP DMSO |           | Ungated A |        | 20236 | 66.69  | 381.97   | 397.50 |               |

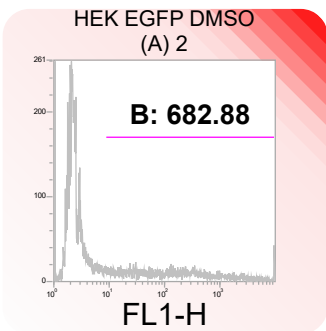

| FCS Key 1     | FCS Key 2 | Gate | Region | Count | %Gated | X Median | X Mean | Error Message |
|---------------|-----------|------|--------|-------|--------|----------|--------|---------------|
| HEK EGFP DMSO |           | A B  |        | 6087  | 30.08  | 127.49   | 682.88 |               |

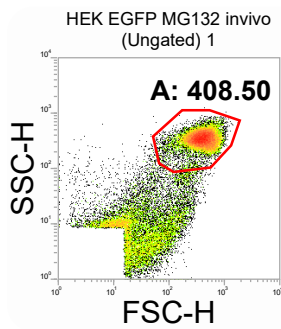

| FCS Key 1             | FCS Key 2 | Gate      | Region | Count | %Gated | X Median | X Mean | Error Message |
|-----------------------|-----------|-----------|--------|-------|--------|----------|--------|---------------|
| HEK EGFP MG132 invivo |           | Ungated A |        | 20264 | 57.86  | 388.91   | 408.50 |               |

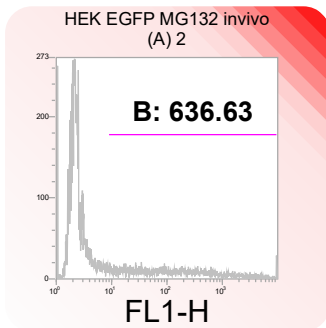

| FCS Key 1             | FCS Key 2 | Gate | Region | Count | %Gated | X Median | X Mean | Error Message |
|-----------------------|-----------|------|--------|-------|--------|----------|--------|---------------|
| HEK EGFP MG132 invivo |           | A B  |        | 5651  | 27.89  | 106.50   | 636.63 |               |

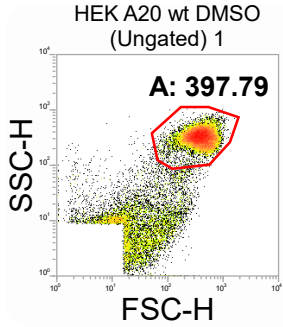

| FCS Key 1       | FCS Key 2 | Gate      | Region | Count | %Gated | X Median | X Mean | Error Message |
|-----------------|-----------|-----------|--------|-------|--------|----------|--------|---------------|
| HEK A20 wt DMSO |           | Ungated A |        | 20162 | 68.33  | 378.55   | 397.79 |               |

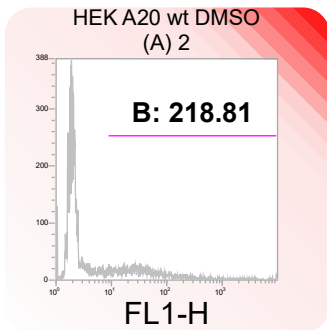

| FCS Key 1       | FCS Key 2 | Gate | Region | Count | %Gated | X Median | X Mean | Error Message |
|-----------------|-----------|------|--------|-------|--------|----------|--------|---------------|
| HEK A20 wt DMSO |           | A B  |        | 5568  | 27.62  | 35.55    | 218.81 |               |

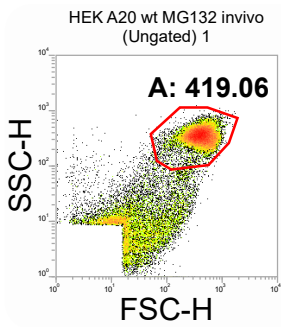

| FCS Key 1               | FCS Key 2 | Gate      | Region | Count | %Gated | X Median | X Mean | Error Message |
|-------------------------|-----------|-----------|--------|-------|--------|----------|--------|---------------|
| HEK A20 wt MG132 invivo |           | Ungated A |        | 20192 | 59.55  | 399.54   | 419.06 |               |

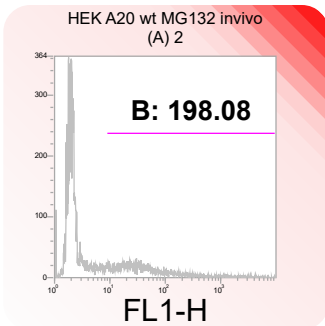

| FCS Key 1               | FCS Key 2 | Gate | Region | Count | %Gated | X Median | X Mean | Error Message |
|-------------------------|-----------|------|--------|-------|--------|----------|--------|---------------|
| HEK A20 wt MG132 invivo |           | A B  |        | 5651  | 27.99  | 34.29    | 198.08 |               |

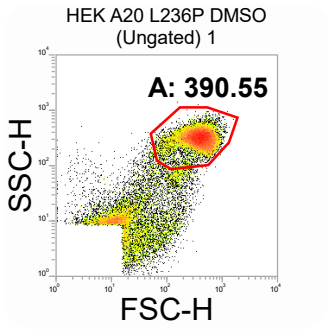

| FCS Key 1     | FCS Key 2 | Gate    | Region | Count | %Gated | X Median | X Mean | Error Message |
|---------------|-----------|---------|--------|-------|--------|----------|--------|---------------|
| HEK A20 L236P | DMSO      | Ungated | A      | 20496 | 61.34  | 378.55   | 390.55 |               |

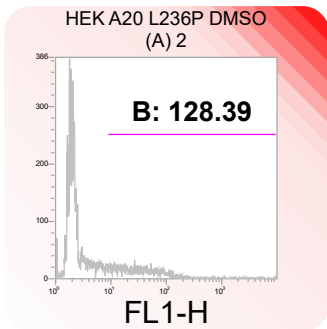

| FCS Key 1     | FCS Key 2 | Gate | Region | Count | %Gated | X Median | X Mean | Error Message |
|---------------|-----------|------|--------|-------|--------|----------|--------|---------------|
| HEK A20 L236P | DMSO      | A    | B      | 4784  | 23.34  | 30.23    | 128.39 |               |

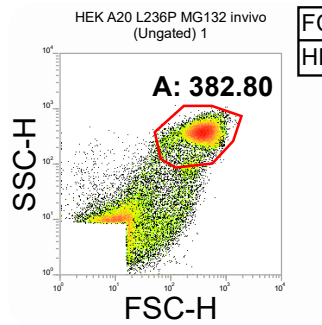

| FCS Key 1     | FCS Key 2    | Gate    | Region | Count | %Gated | X Median | X Mean | Error Message |
|---------------|--------------|---------|--------|-------|--------|----------|--------|---------------|
| HEK A20 L236P | MG132 invivo | Ungated | A      | 20449 | 53.46  | 365.17   | 382.80 |               |

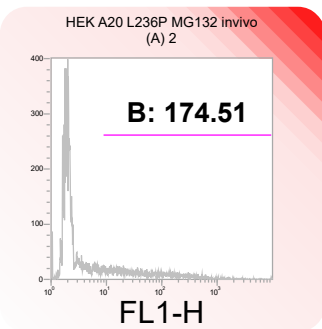

| FCS Key 1     | FCS Key 2    | Gate | Region | Count | %Gated | X Median | X Mean | Error Message |
|---------------|--------------|------|--------|-------|--------|----------|--------|---------------|
| HEK A20 L236P | MG132 invivo | A    | B      | 5083  | 24.86  | 41.05    | 174.51 |               |



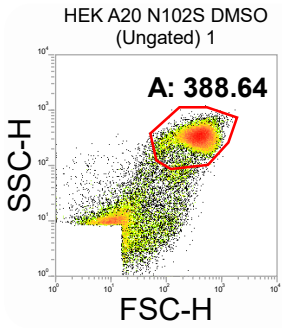

| FCS Key 1     | FCS Key 2 | Gate    | Region | Count | %Gated | X Median | X Mean | Error Message |
|---------------|-----------|---------|--------|-------|--------|----------|--------|---------------|
| HEK A20 N102S | DMSO      | Ungated | A      | 20564 | 59.21  | 375.16   | 388.64 |               |

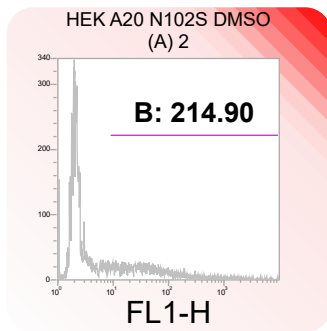

| FCS Key 1     | FCS Key 2 | Gate | Region | Count | %Gated | X Median | X Mean | Error Message |
|---------------|-----------|------|--------|-------|--------|----------|--------|---------------|
| HEK A20 N102S | DMSO      | A    | B      | 6169  | 30.00  | 40.32    | 214.90 |               |

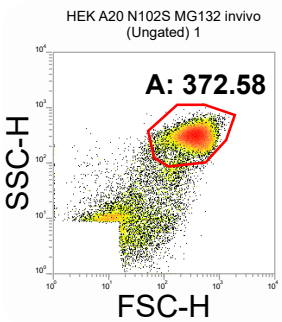

| FCS Key 1     | FCS Key 2    | Gate    | Region | Count | %Gated | X Median | X Mean | Error Message |
|---------------|--------------|---------|--------|-------|--------|----------|--------|---------------|
| HEK A20 N102S | MG132 invivo | Ungated | A      | 20386 | 70.16  | 355.45   | 372.58 |               |

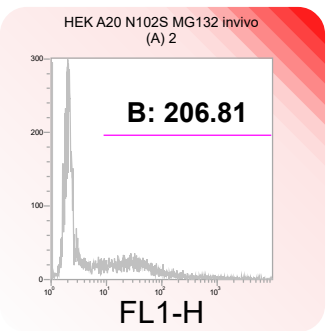

| FCS Key 1     | FCS Key 2    | Gate | Region | Count | %Gated | X Median | X Mean | Error Message |
|---------------|--------------|------|--------|-------|--------|----------|--------|---------------|
| HEK A20 N102S | MG132 invivo | A    | B      | 6753  | 33.13  | 36.19    | 206.81 |               |

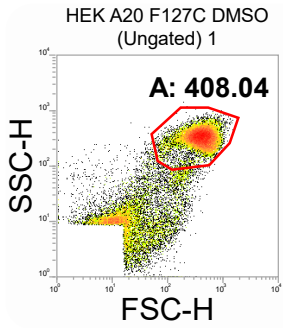

| FCS Key 1          | FCS Key 2 | Gate      | Region | Count | %Gated | X Median | X Mean | Error Message |
|--------------------|-----------|-----------|--------|-------|--------|----------|--------|---------------|
| HEK A20 F127C DMSO |           | Ungated A |        | 20349 | 62.53  | 392.42   | 408.04 |               |

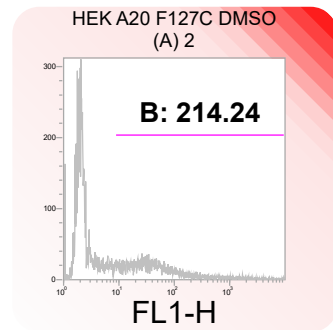

| FCS Key 1          | FCS Key 2 | Gate | Region | Count | %Gated | X Median | X Mean | Error Message |
|--------------------|-----------|------|--------|-------|--------|----------|--------|---------------|
| HEK A20 F127C DMSO |           | A B  |        | 6802  | 33.43  | 37.18    | 214.24 |               |

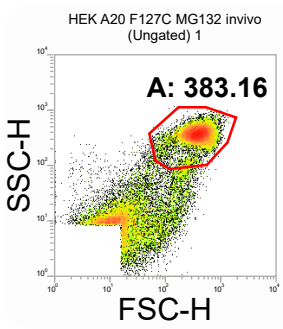

| FCS Key 1                  | FCS Key 2 | Gate      | Region | Count | %Gated | X Median | X Mean | Error Message |
|----------------------------|-----------|-----------|--------|-------|--------|----------|--------|---------------|
| HEK A20 F127C MG132 invivo |           | Ungated A |        | 20376 | 51.06  | 365.17   | 383.16 |               |

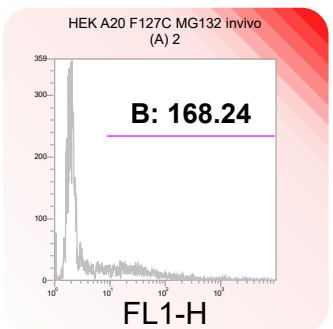

| FCS Key 1                  | FCS Key 2 | Gate | Region | Count | %Gated | X Median | X Mean | Error Message |
|----------------------------|-----------|------|--------|-------|--------|----------|--------|---------------|
| HEK A20 F127C MG132 invivo |           | A B  |        | 5295  | 25.99  | 32.20    | 168.24 |               |

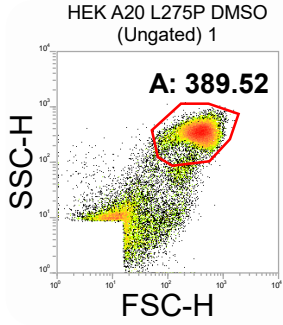

| FCS Key 1     | FCS Key 2 | Gate    | Region | Count | %Gated | X Median | X Mean | Error Message |
|---------------|-----------|---------|--------|-------|--------|----------|--------|---------------|
| HEK A20 L275P | DMSO      | Ungated | A      | 20384 | 62.52  | 375.16   | 389.52 |               |

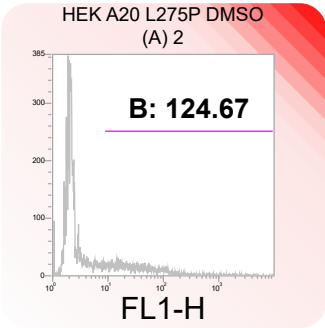

| FCS Key 1     | FCS Key 2 | Gate | Region | Count | %Gated | X Median | X Mean | Error Message |
|---------------|-----------|------|--------|-------|--------|----------|--------|---------------|
| HEK A20 L275P | DMSO      | A    | B      | 4825  | 23.67  | 31.34    | 124.67 |               |

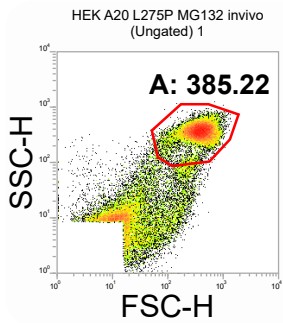

| FCS Key 1     | FCS Key 2    | Gate    | Region | Count | %Gated | X Median | X Mean | Error Message |
|---------------|--------------|---------|--------|-------|--------|----------|--------|---------------|
| HEK A20 L275P | MG132 invivo | Ungated | A      | 20396 | 52.09  | 365.17   | 385.22 |               |

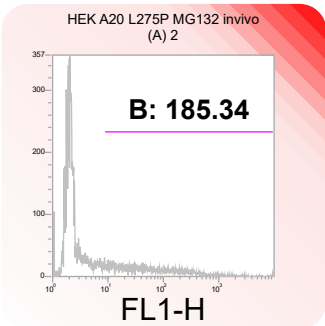

| FCS Key 1     | FCS Key 2    | Gate | Region | Count | %Gated | X Median | X Mean | Error Message |
|---------------|--------------|------|--------|-------|--------|----------|--------|---------------|
| HEK A20 L275P | MG132 invivo | A    | B      | 5311  | 26.04  | 46.14    | 185.34 |               |

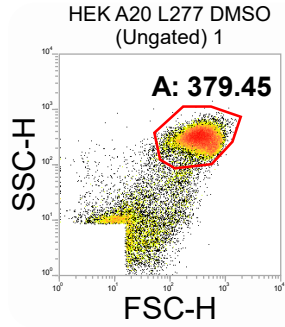

| FCS Key 1    | FCS Key 2 | Gate    | Region | Count | %Gated | X Median | X Mean | Error Message |
|--------------|-----------|---------|--------|-------|--------|----------|--------|---------------|
| HEK A20 L277 | DMSO      | Ungated | A      | 20372 | 70.75  | 352.27   | 379.45 |               |

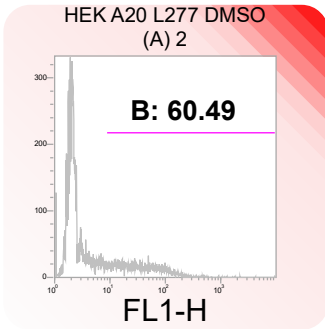

| FCS Key 1    | FCS Key 2 | Gate | Region | Count | %Gated | X Median | X Mean | Error Message |
|--------------|-----------|------|--------|-------|--------|----------|--------|---------------|
| HEK A20 L277 | DMSO      | A    | B      | 5074  | 24.91  | 32.20    | 60.49  |               |

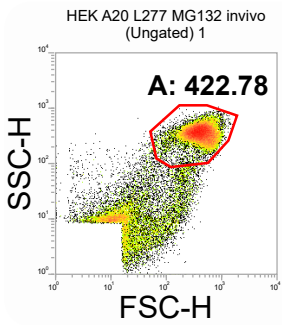

| FCS Key 1    | FCS Key 2    | Gate    | Region | Count | %Gated | X Median | X Mean | Error Message |
|--------------|--------------|---------|--------|-------|--------|----------|--------|---------------|
| HEK A20 L277 | MG132 invivo | Ungated | A      | 20296 | 60.63  | 395.96   | 422.78 |               |

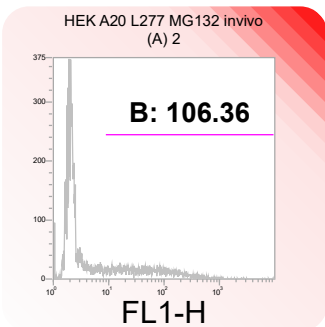

| FCS Key 1    | FCS Key 2    | Gate | Region | Count | %Gated | X Median | X Mean | Error Message |
|--------------|--------------|------|--------|-------|--------|----------|--------|---------------|
| HEK A20 L277 | MG132 invivo | A    | B      | 5758  | 28.37  | 45.73    | 106.36 |               |
